# Supplementary material for: Conversion of Medium-Sized Lactams to α-Vinyl or α-Acetylenyl Azacycles via N,O-Acetal TMS Ethers
Source: PubMed Central journal article supplement (PMC6278647; doi:10.3390/molecules23113023), 2018-11-19

## Supplementary Information

### Conversion of Medium-sized Lactam to $\alpha$ -Vinylated or $\alpha$ -Acetylenylated Azacycles

#### *via N,O-Acetal TMS Ethers*

**Minjun Kim,<sup>1,§</sup> Jaebong Jang,<sup>2,3,§</sup> Goyoung Choi,<sup>1</sup> Sungkyun Chung,<sup>4</sup> Changjin Lim,<sup>4</sup> Joonseong Hur,<sup>5</sup>  
Hyun Su Kim,<sup>4</sup> Younghwa Na<sup>4</sup>, Woo Sung Son<sup>4</sup>, Young-Ger Suh,<sup>d</sup> Jong-Wha Jung,<sup>1,\*</sup> and Seok-Ho Kim,<sup>4,\*</sup>**

<sup>a</sup> College of Pharmacy, Research Institute of Pharmaceutical Sciences, Kyungpook National University, Daegu 41566, Republic of Korea

<sup>b</sup> Department of Cancer Biology, Dana-Farber Cancer Institute, Boston, MA 02215, USA

<sup>c</sup> Department of Biological Chemistry and Molecular Pharmacology, Harvard Medical School, Boston, MA 02215, USA

<sup>d</sup> Department of Pharmacy, College of Pharmacy and Institute of Pharmaceutical Sciences, CHA University, 120 Haeryong-ro, Pocheon 11160, Republic of Korea

<sup>e</sup> College of Pharmacy, Seoul National University, 1 Gwanak-ro, Gwanak-gu, Seoul 08826, Republic of Korea

<sup>§</sup>These authors contributed equally to this work.

Correspondence to: J.-W. Jung ([jungj@knu.ac.kr](mailto:jungj@knu.ac.kr)) and S.-H. Kim ([ksh3410@cha.ac.kr](mailto:ksh3410@cha.ac.kr))

## Table of Contents

|                                                                 |    |
|-----------------------------------------------------------------|----|
| Copies of $^1\text{H}$ NMR and $^{13}\text{C}$ NMR Spectra----- | S1 |
|-----------------------------------------------------------------|----|

# <sup>1</sup>H- and <sup>13</sup>C-NMR Spectra

*tert*-Butyl 2-vinylazepane-1-carboxylate (**4a**)

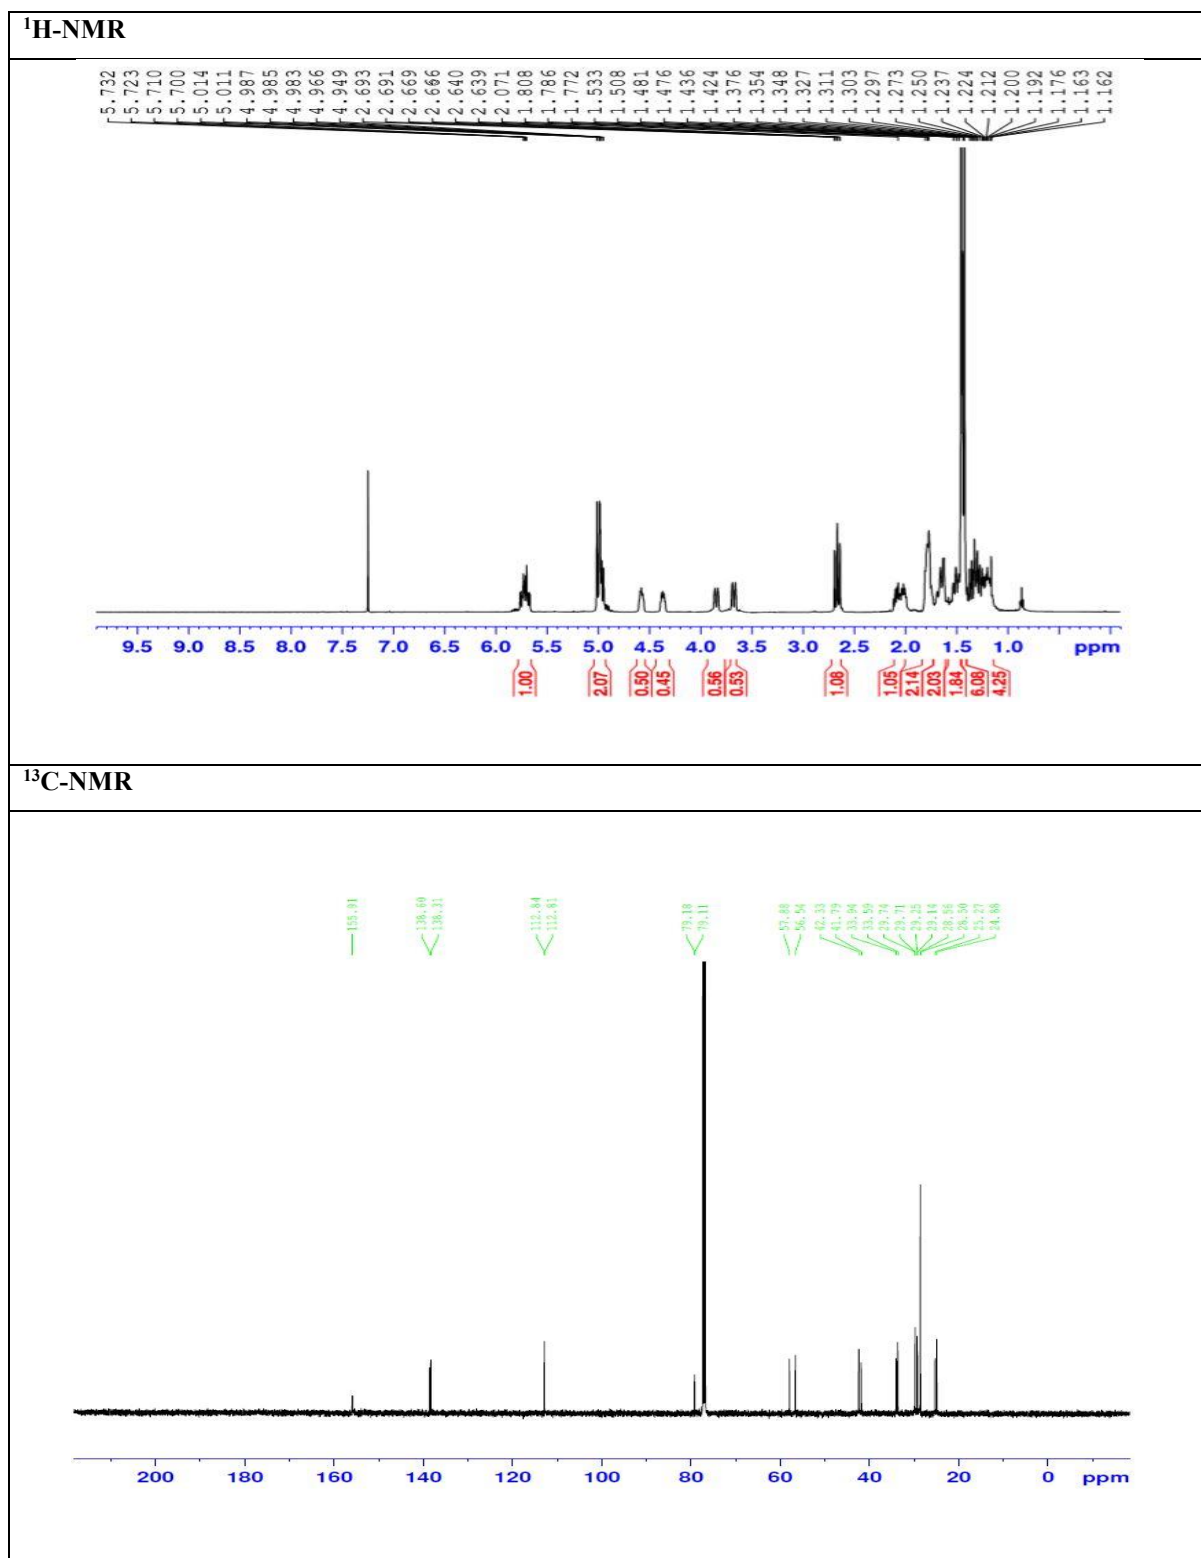

*tert*-Butyl 2-vinylazocane-1-carboxylate (**4b**)

<sup>1</sup>H-NMR

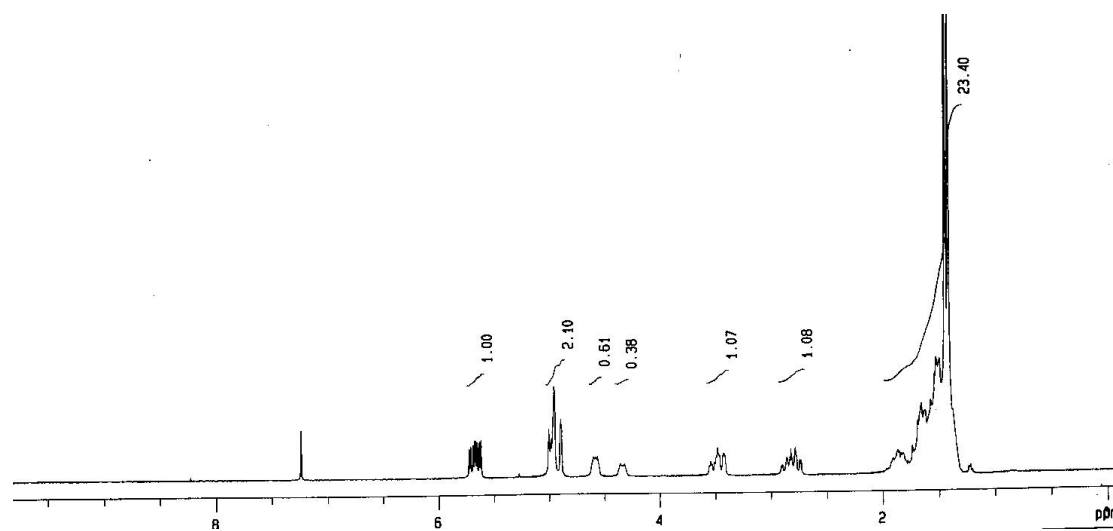

<sup>13</sup>C-NMR

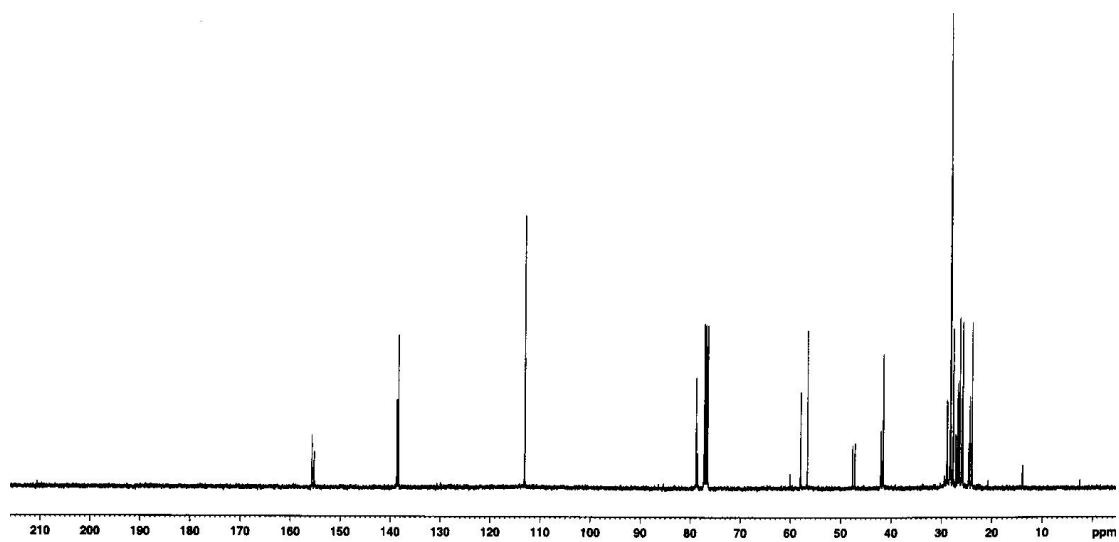

*tert*-Butyl 2-vinylazone-1-carboxylate (**4c**)

<sup>1</sup>H-NMR

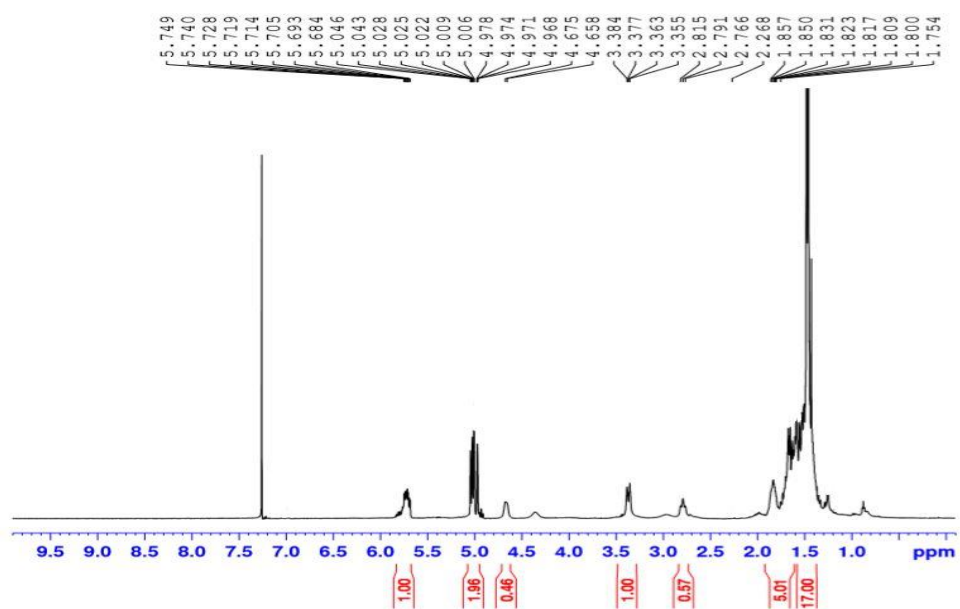

<sup>13</sup>C-NMR

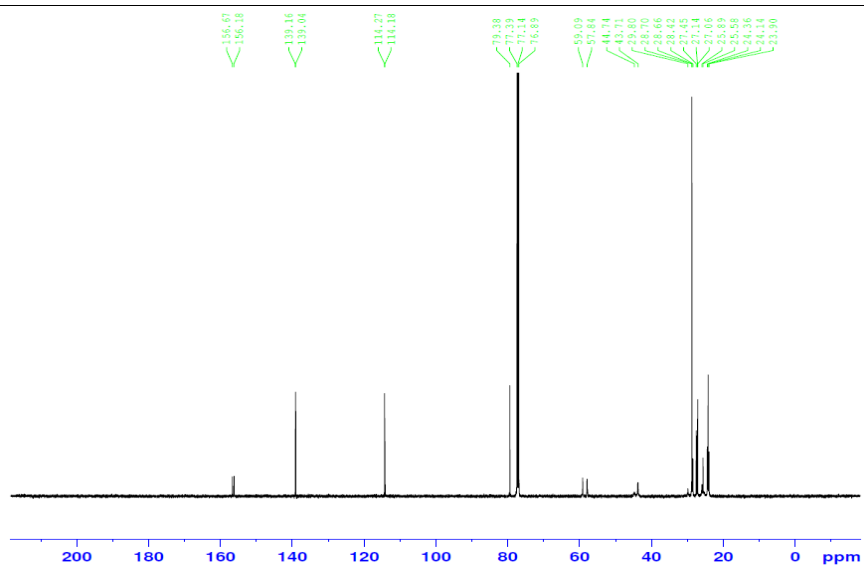

*tert*-Butyl 2-ethynylpiperidine-1-carboxylate (**5a**)

<sup>1</sup>H-NMR

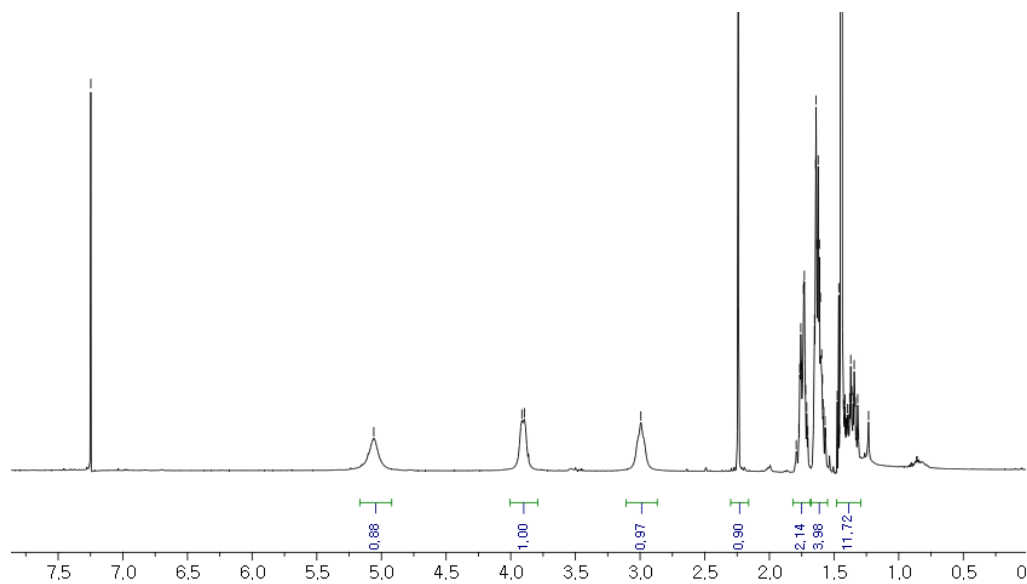

<sup>13</sup>C-NMR

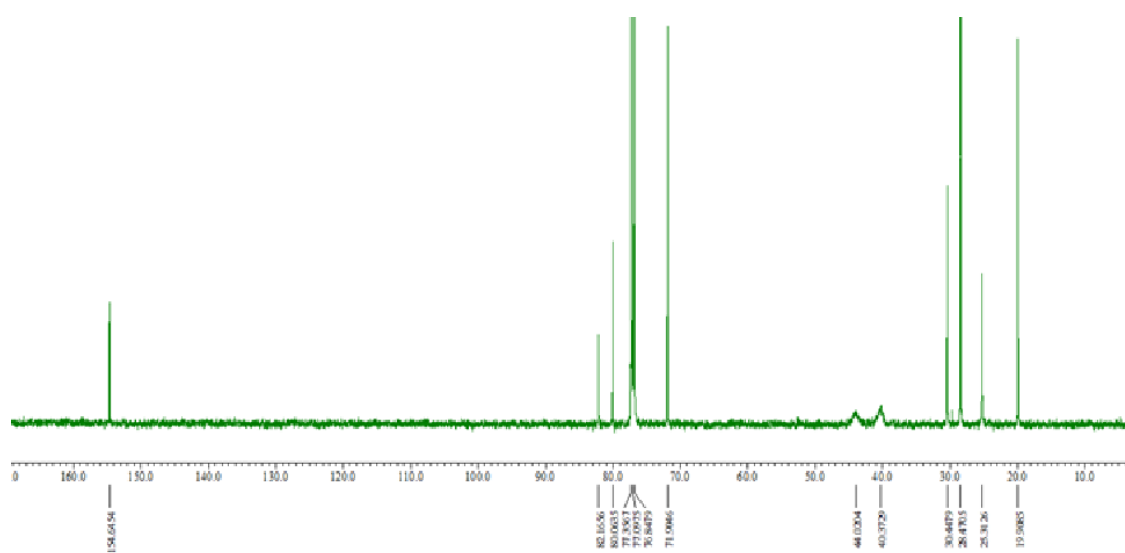

*tert*-Butyl 2-ethynylazepane-1-carboxylate(**5b**)

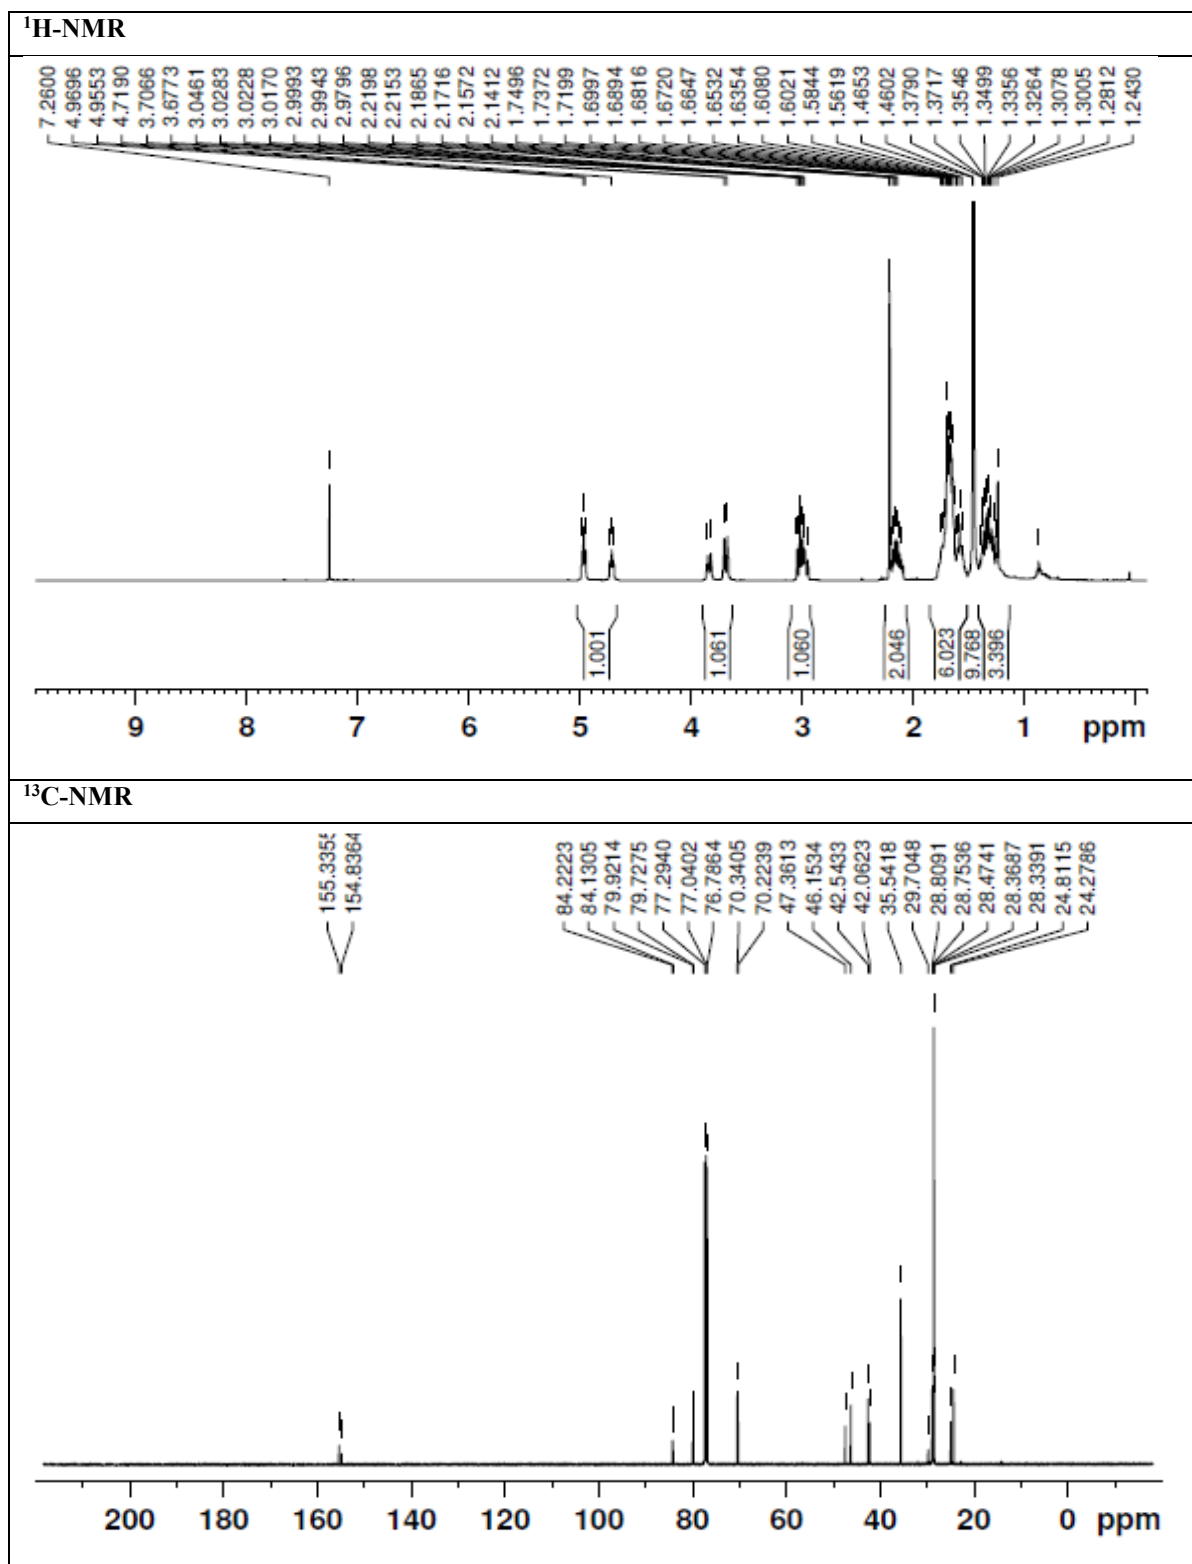

*tert*-Butyl 2-ethynylazocane-1-carboxylate (**5c**)

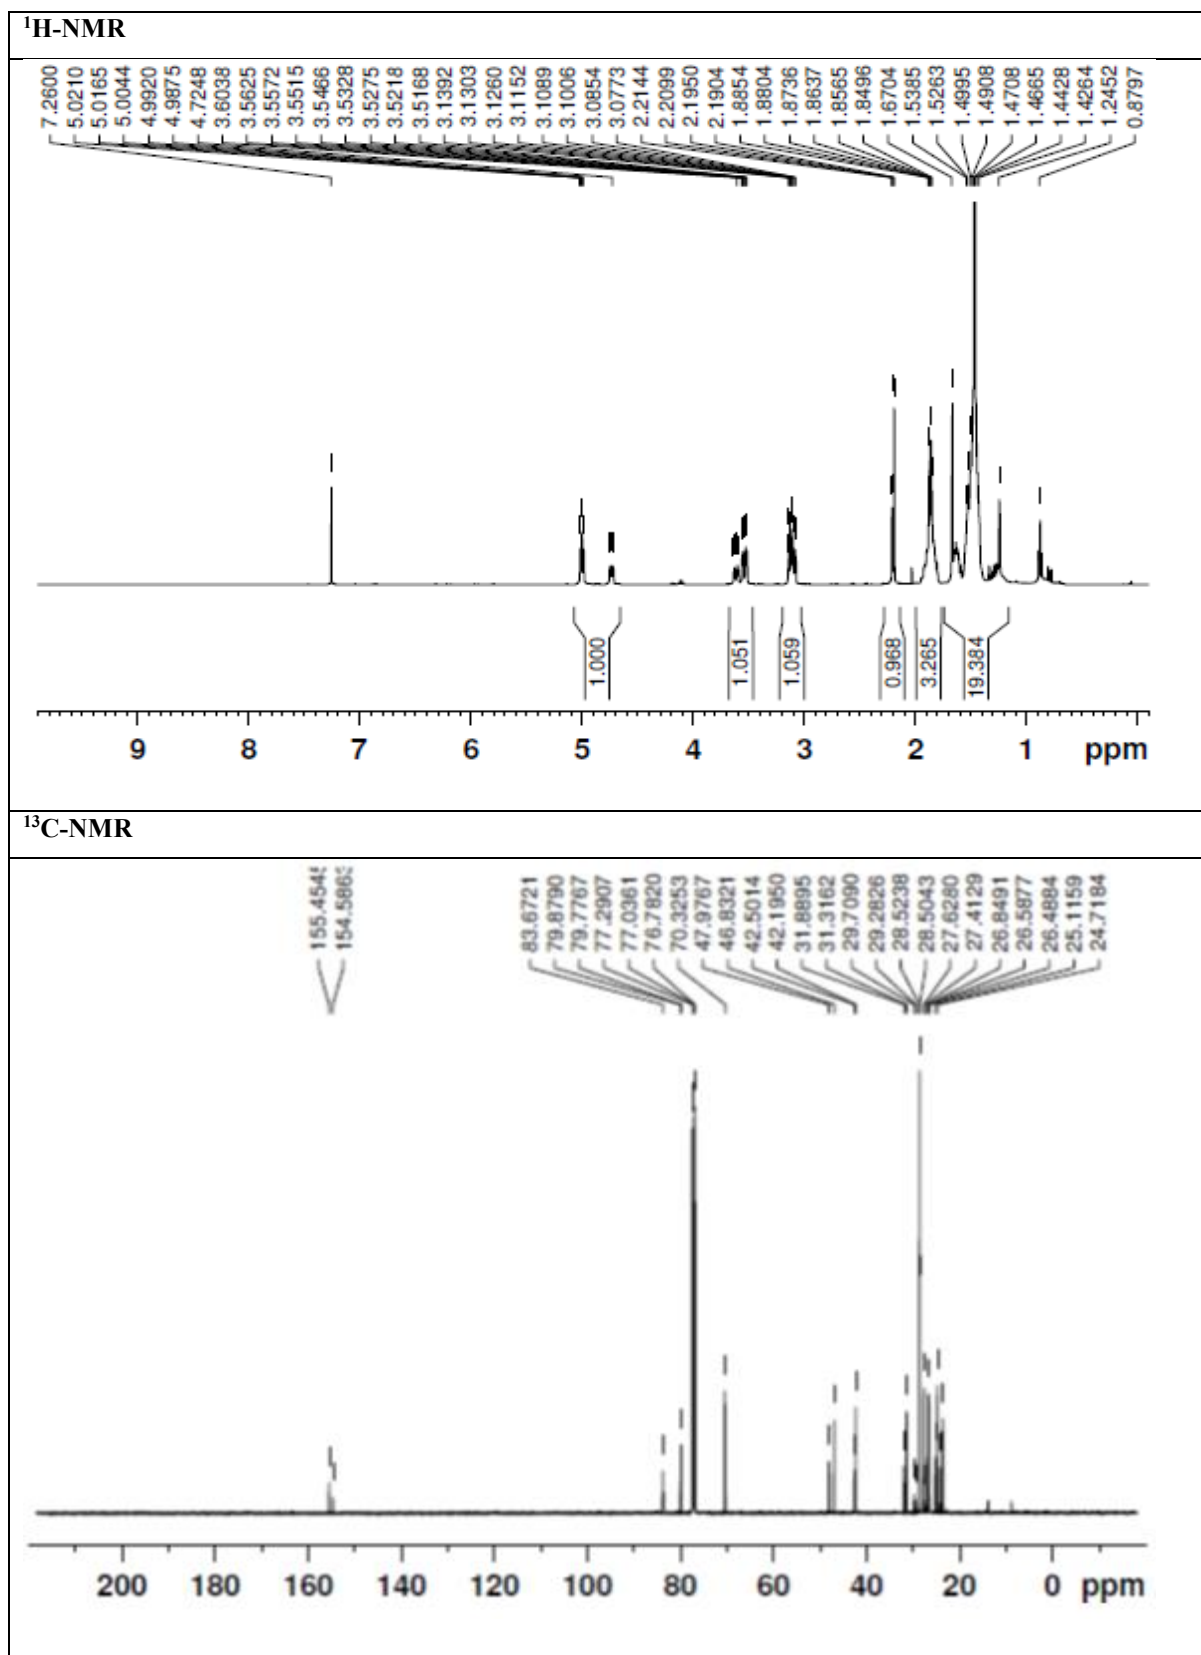



*tert*-Butyl 2-ethynylazonane-1-carboxylate (**5d**)

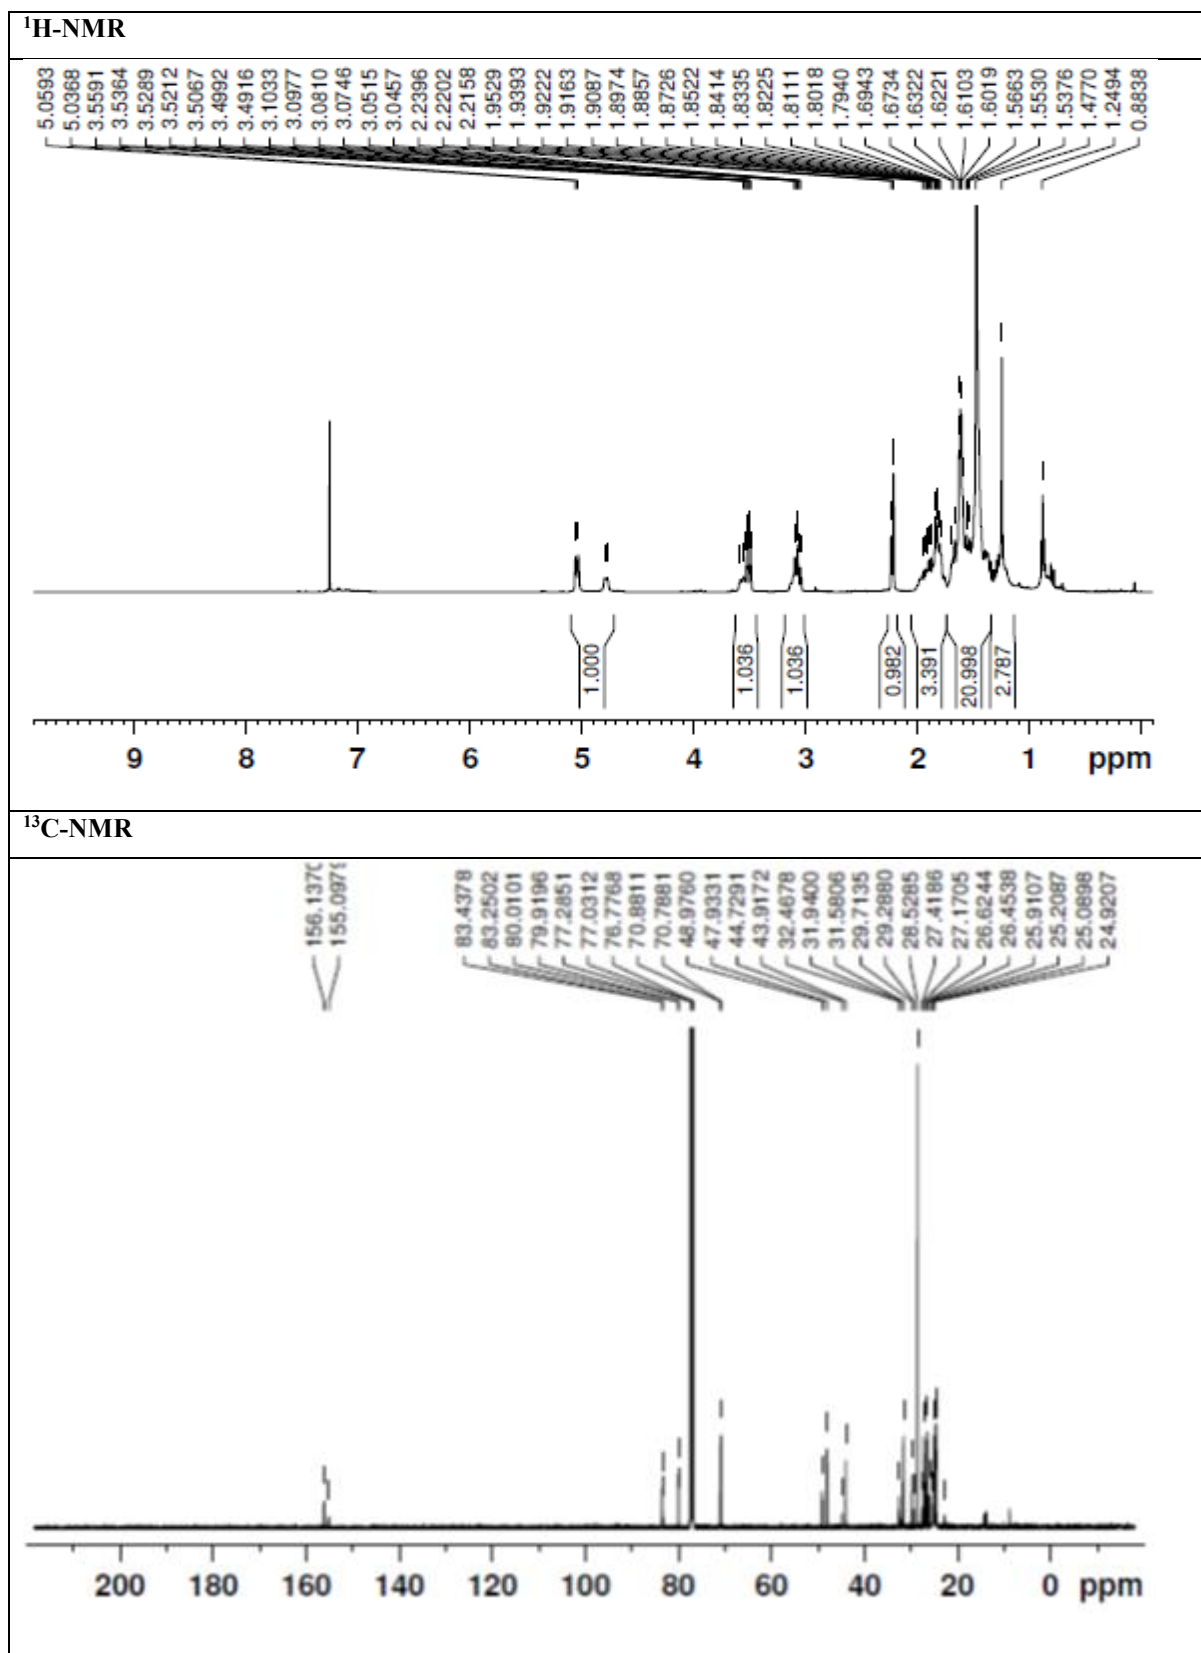

*tert*-Butyl 2-((trimethylsilyl)ethynyl)piperidine-1-carboxylate (**5e**)

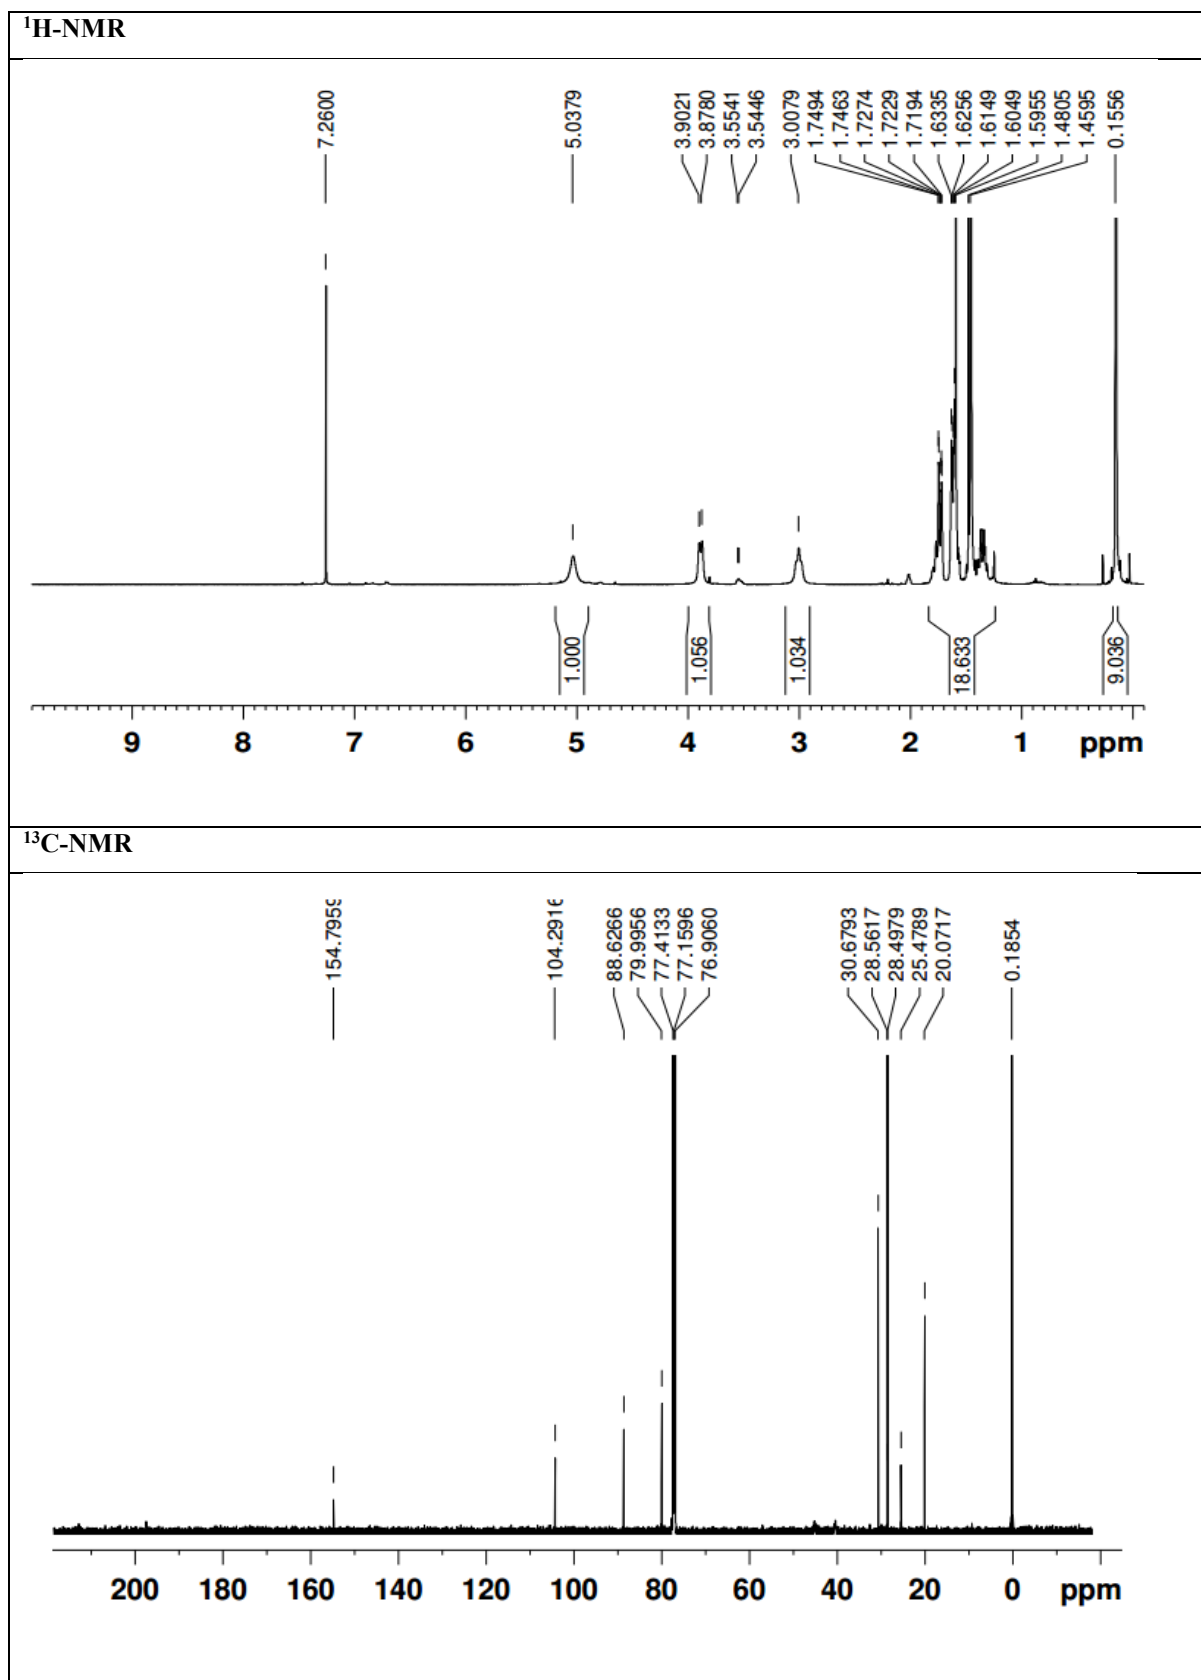

*tert*-Butyl 2-((trimethylsilyl)ethynyl)azepane-1-carboxylate (**5f**)

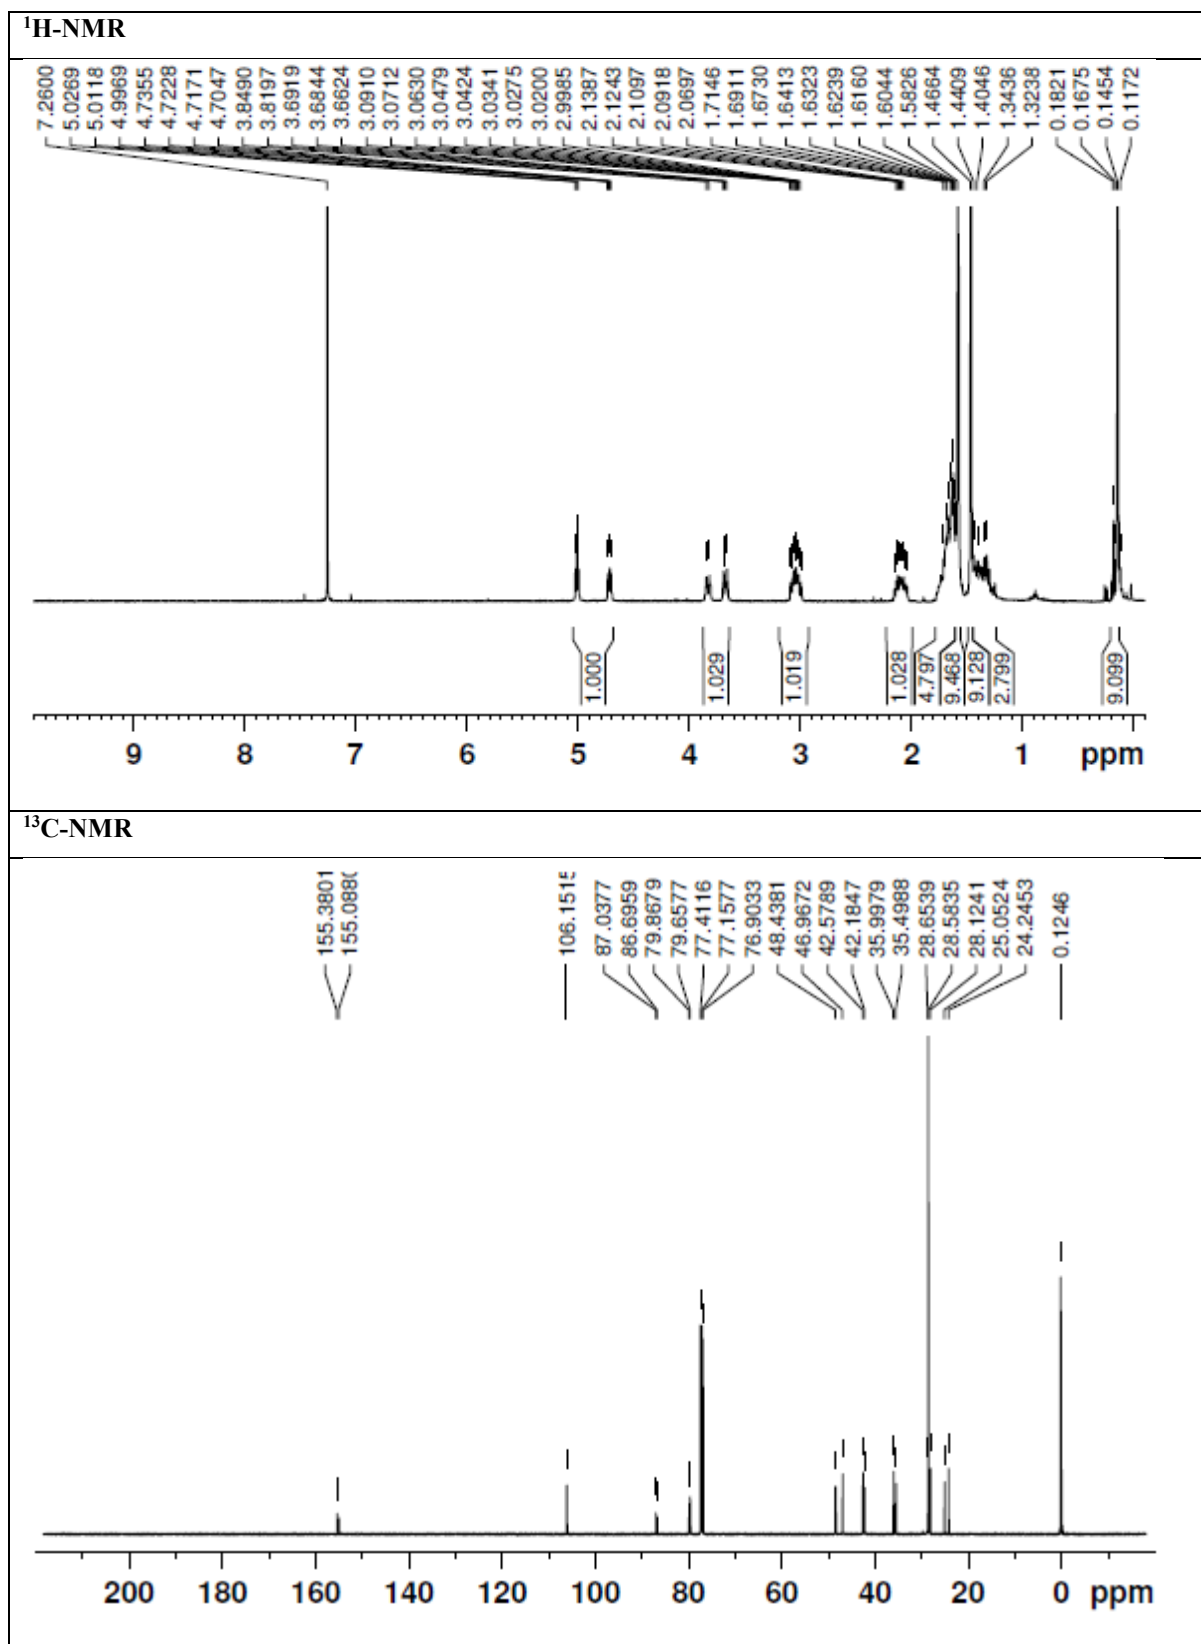

*tert*-Butyl 2-((trimethylsilyl)ethynyl)azocane-1-carboxylate (**5g**)

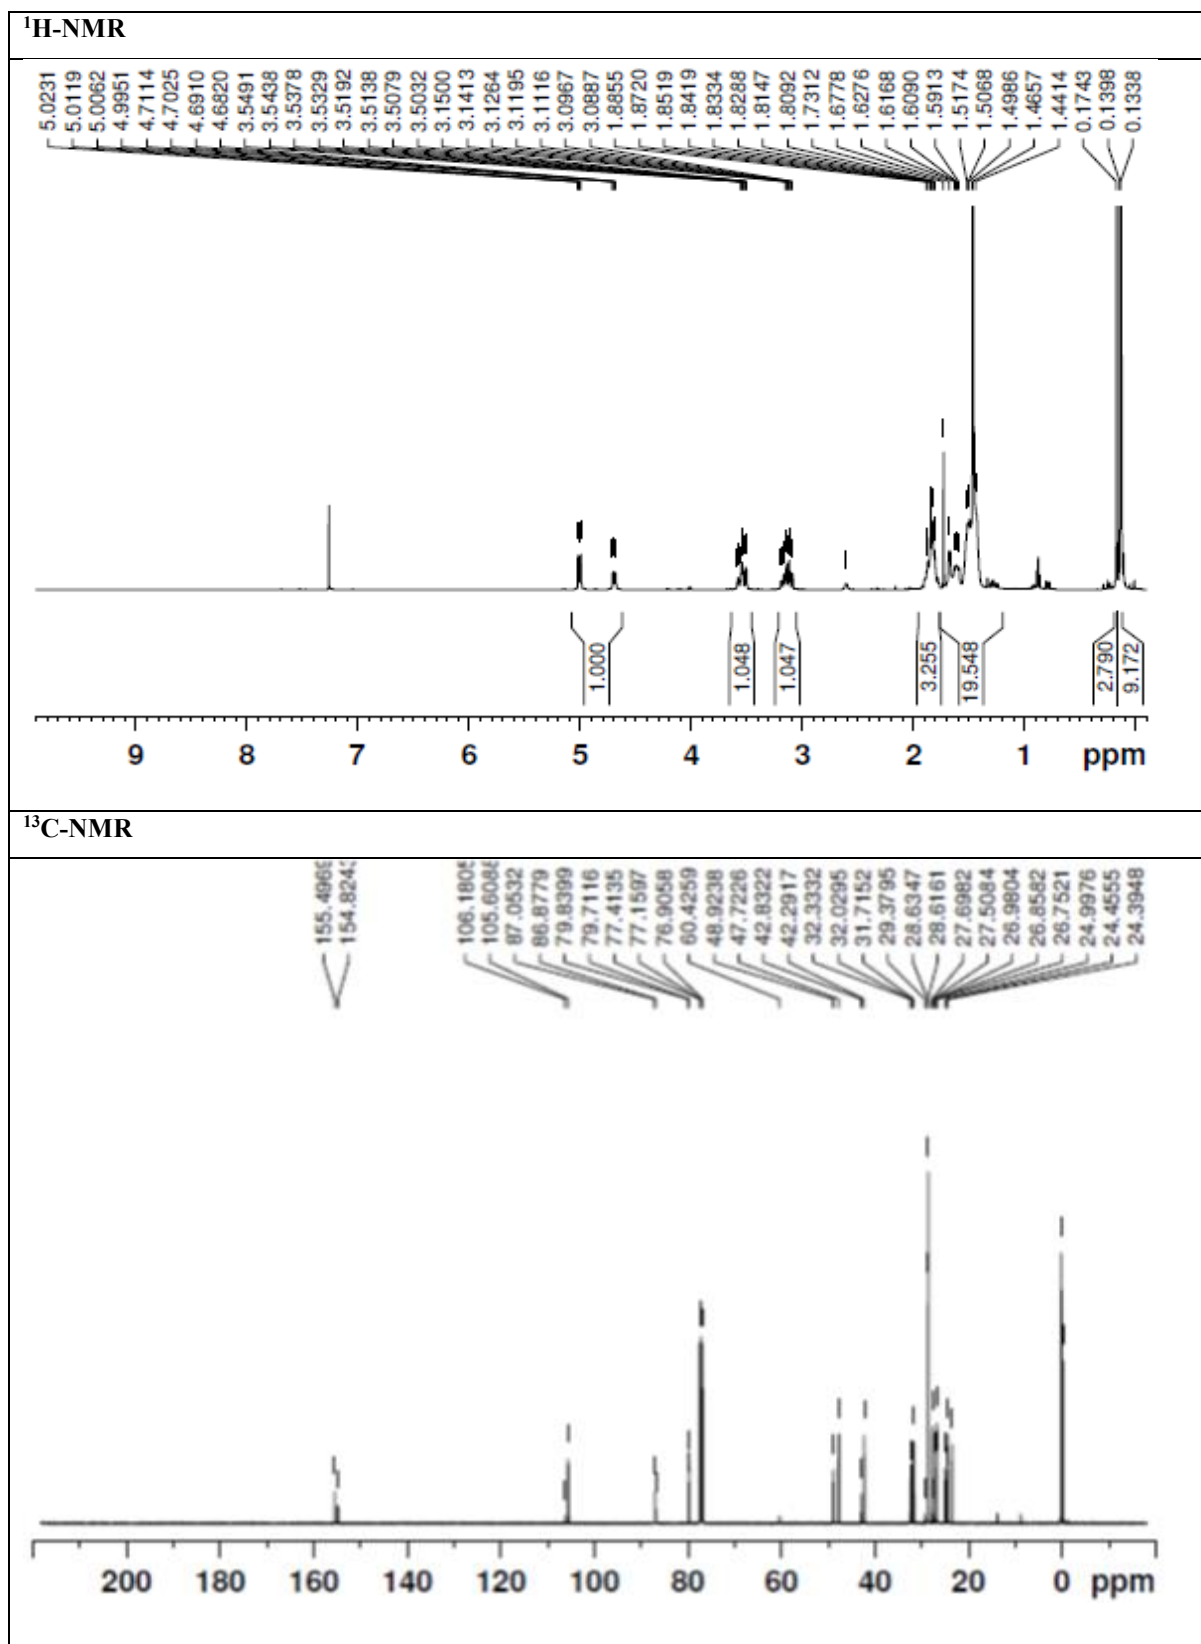

*tert*-Butyl 2-((trimethylsilyl)ethynyl)azonane-1-carboxylate (**5h**)

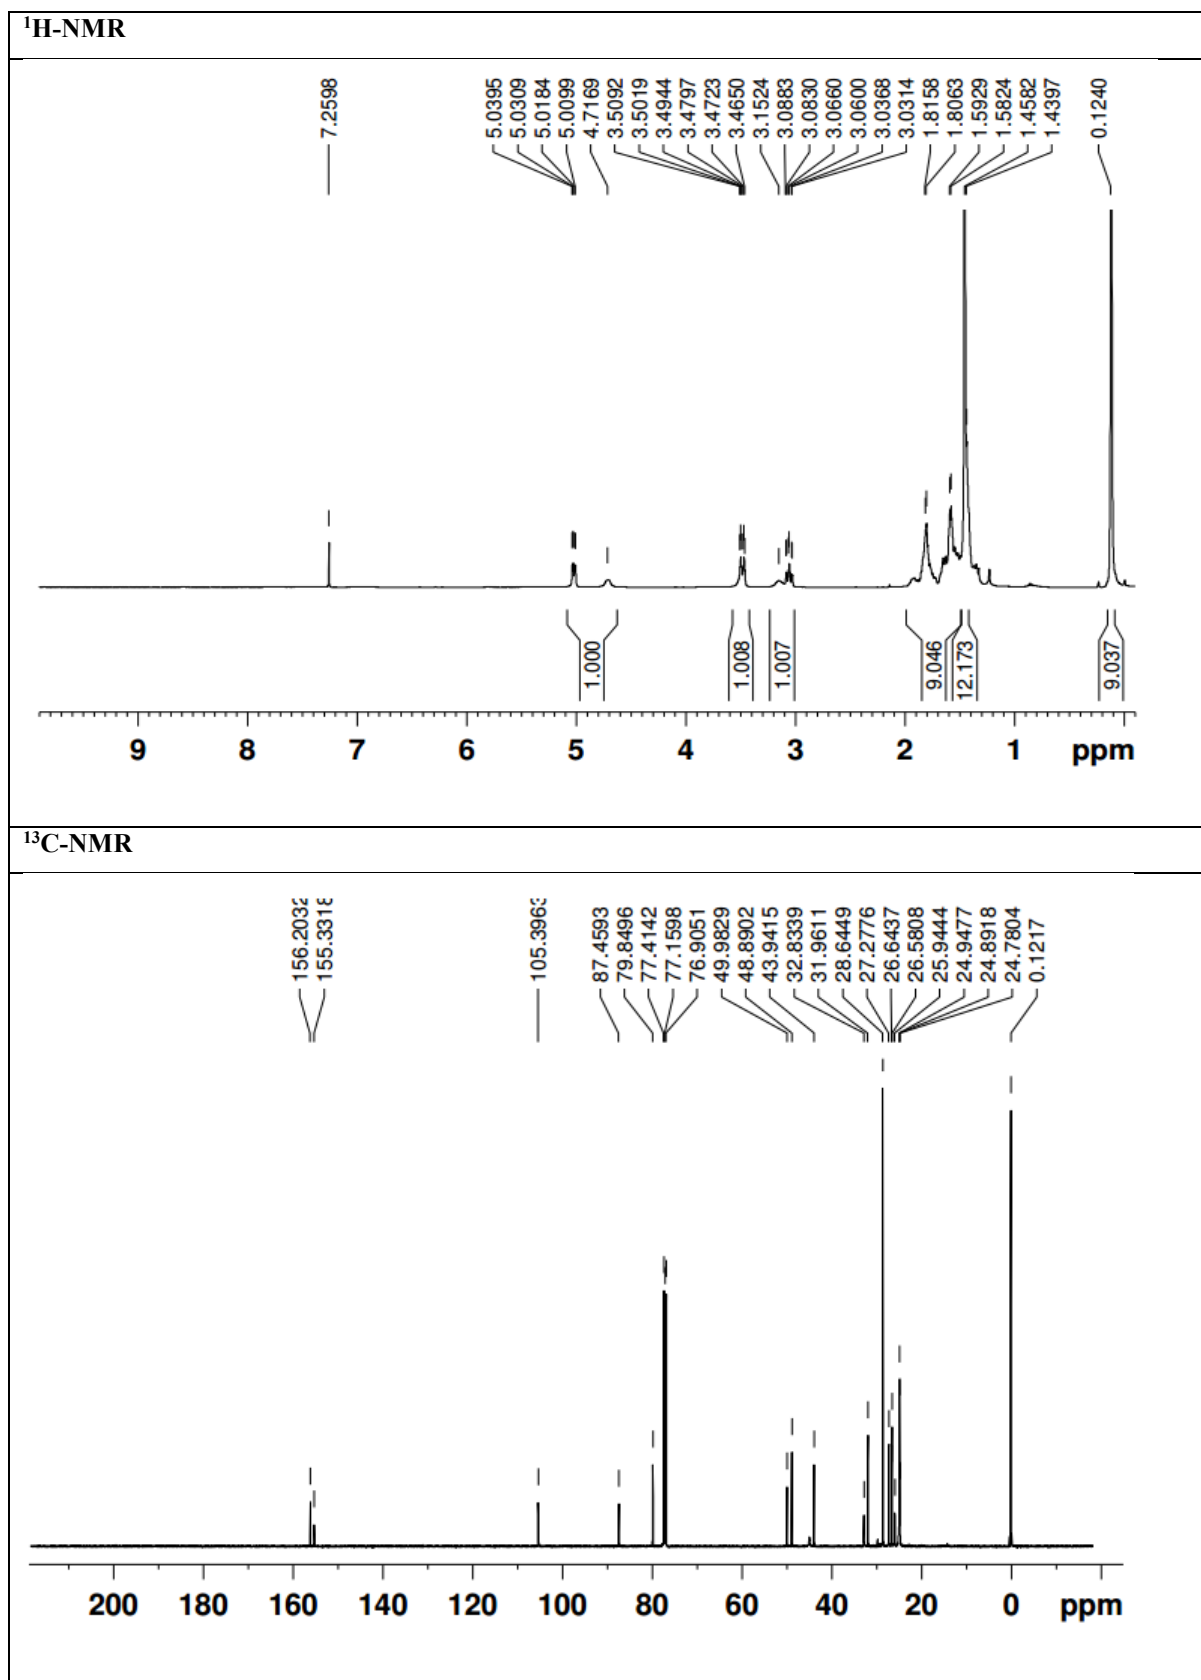

*tert*-Butyl 2-(prop-1-yn-1-yl)piperidine-1-carboxylate (**5i**)

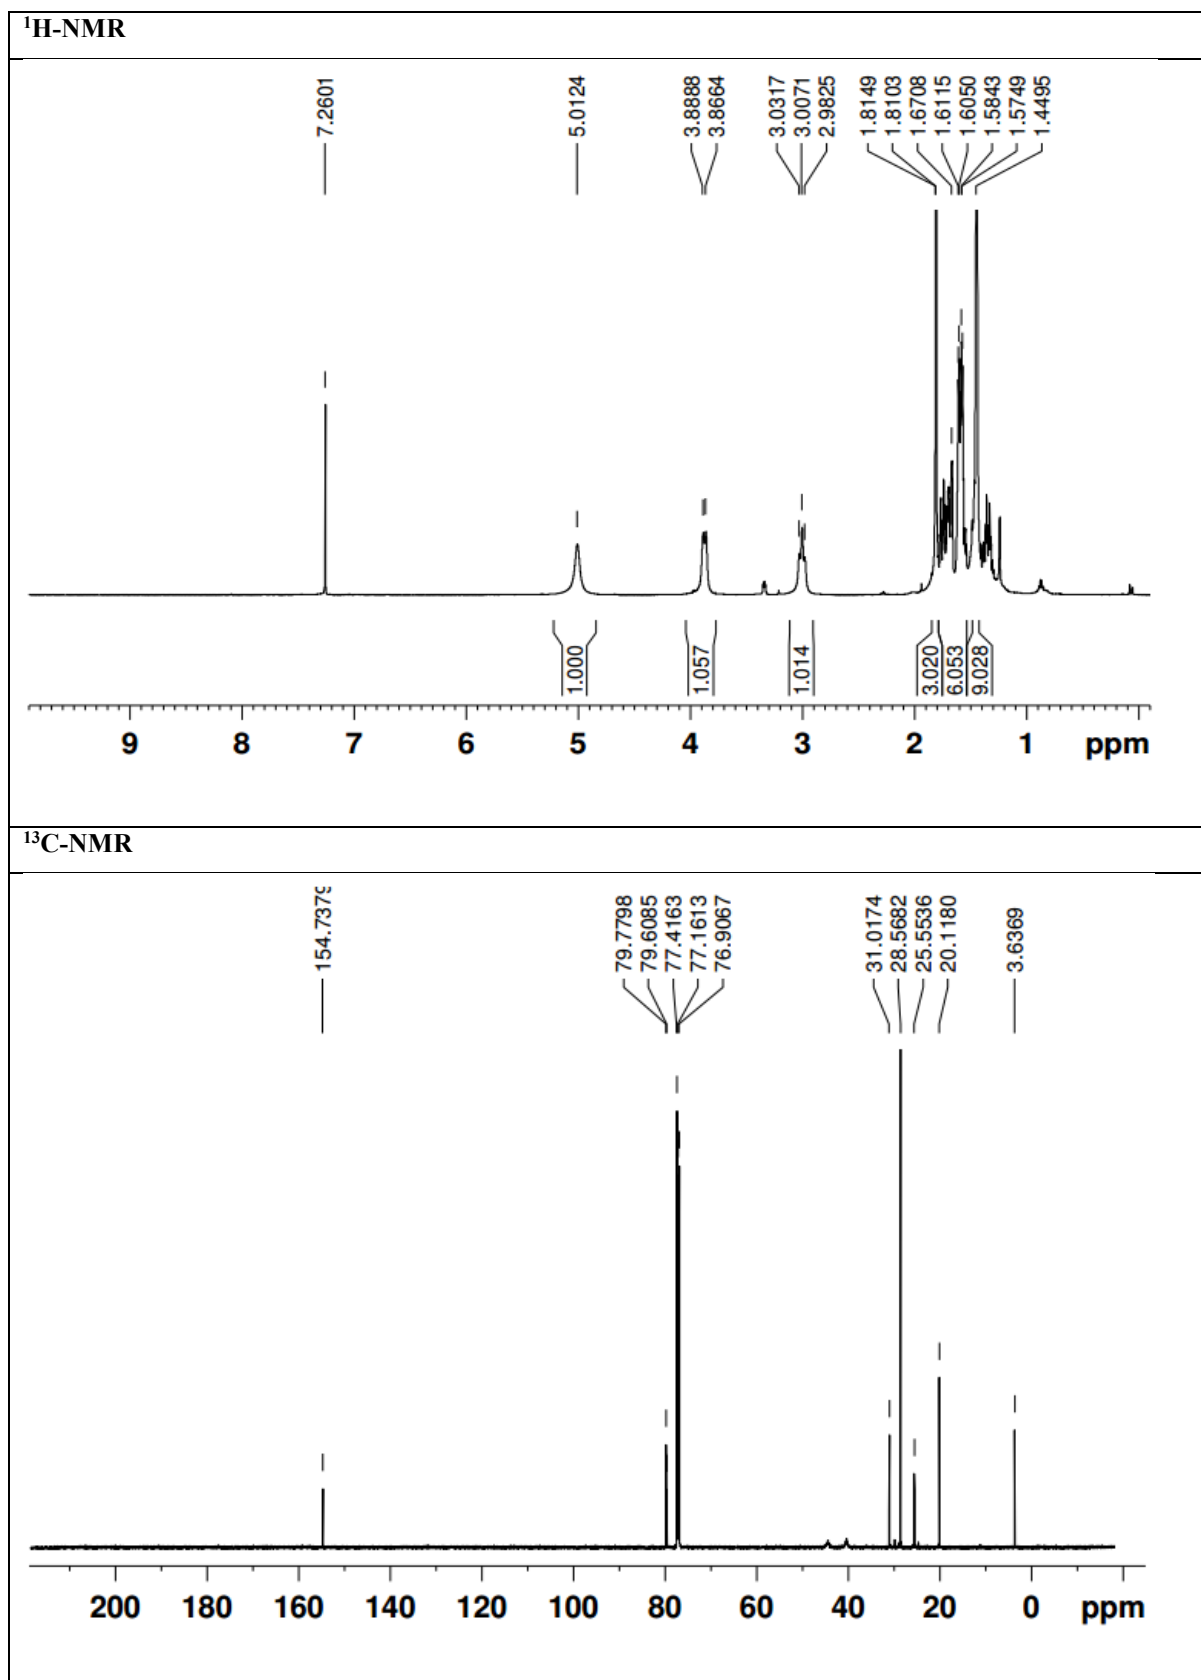

*tert*-Butyl 2-(prop-1-yn-1-yl)azepane-1-carboxylate (**5j**)

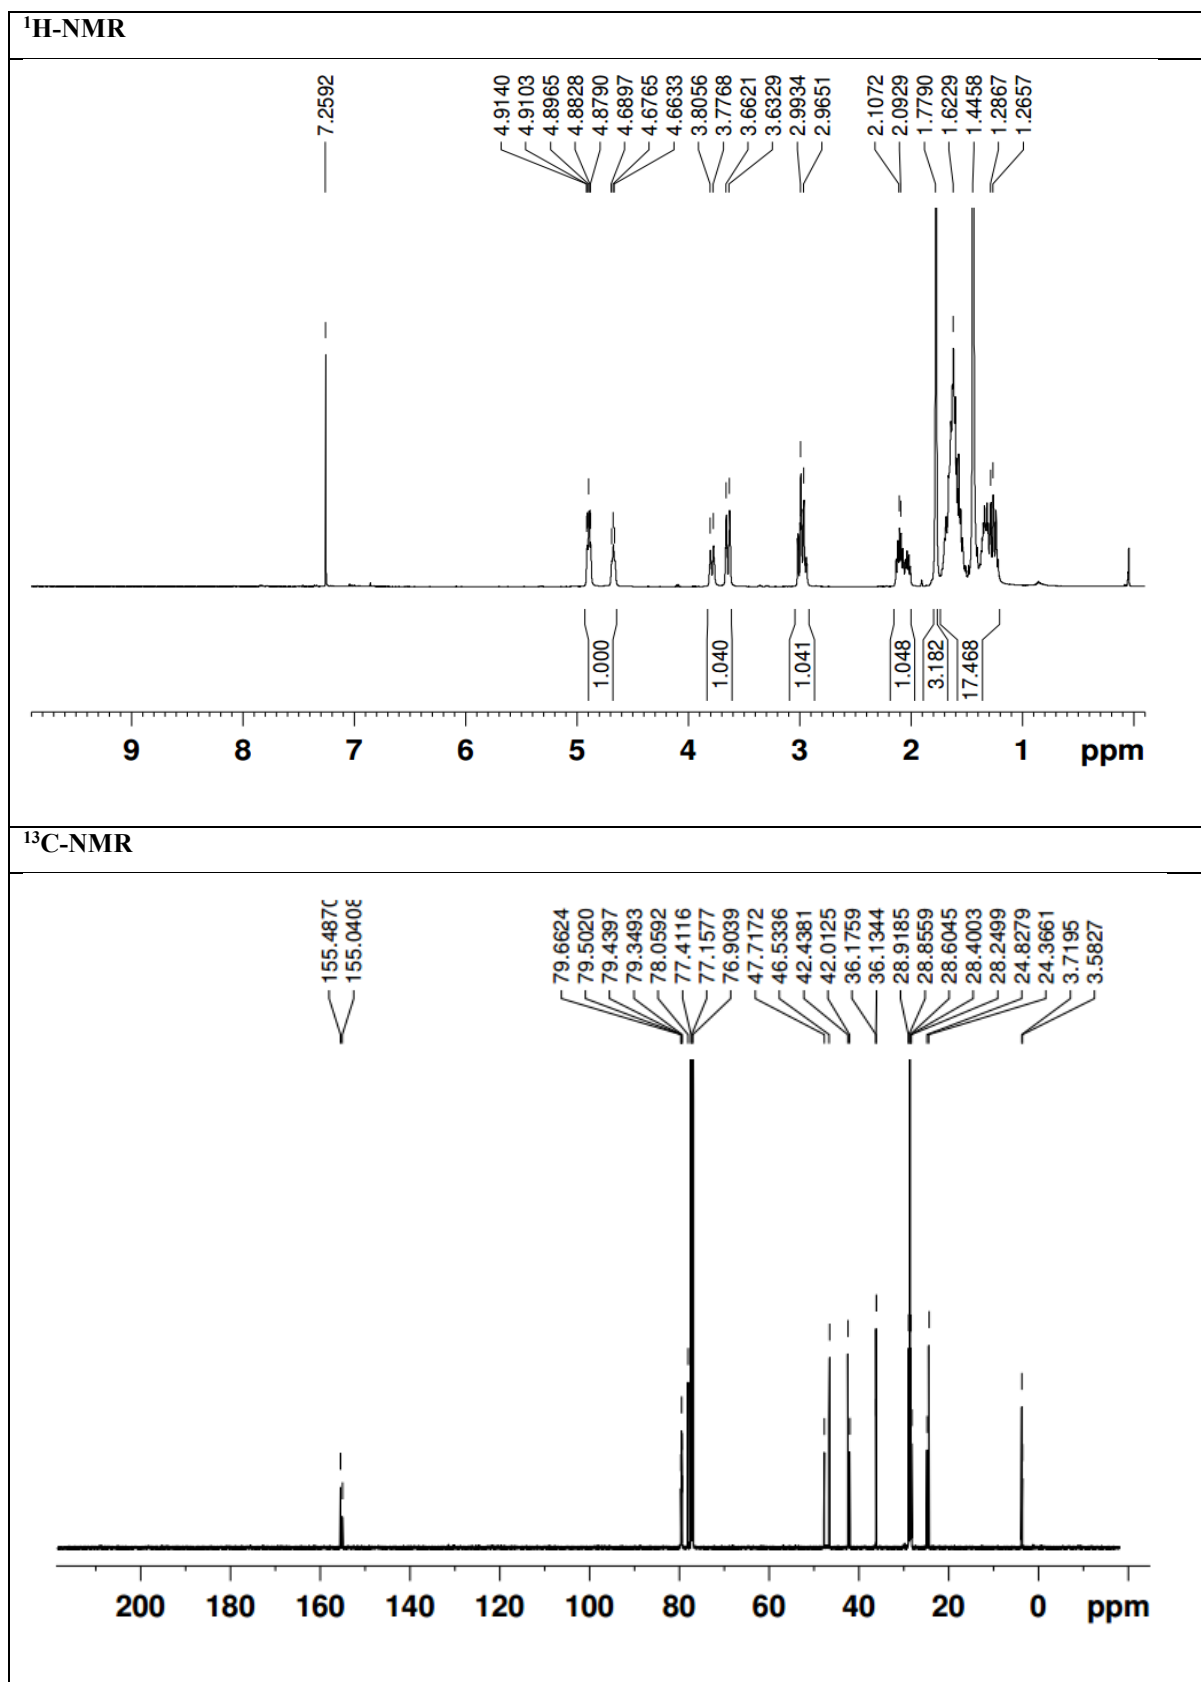

*tert*-Butyl 2-(prop-1-yn-1-yl)azocane-1-carboxylate (**5k**)

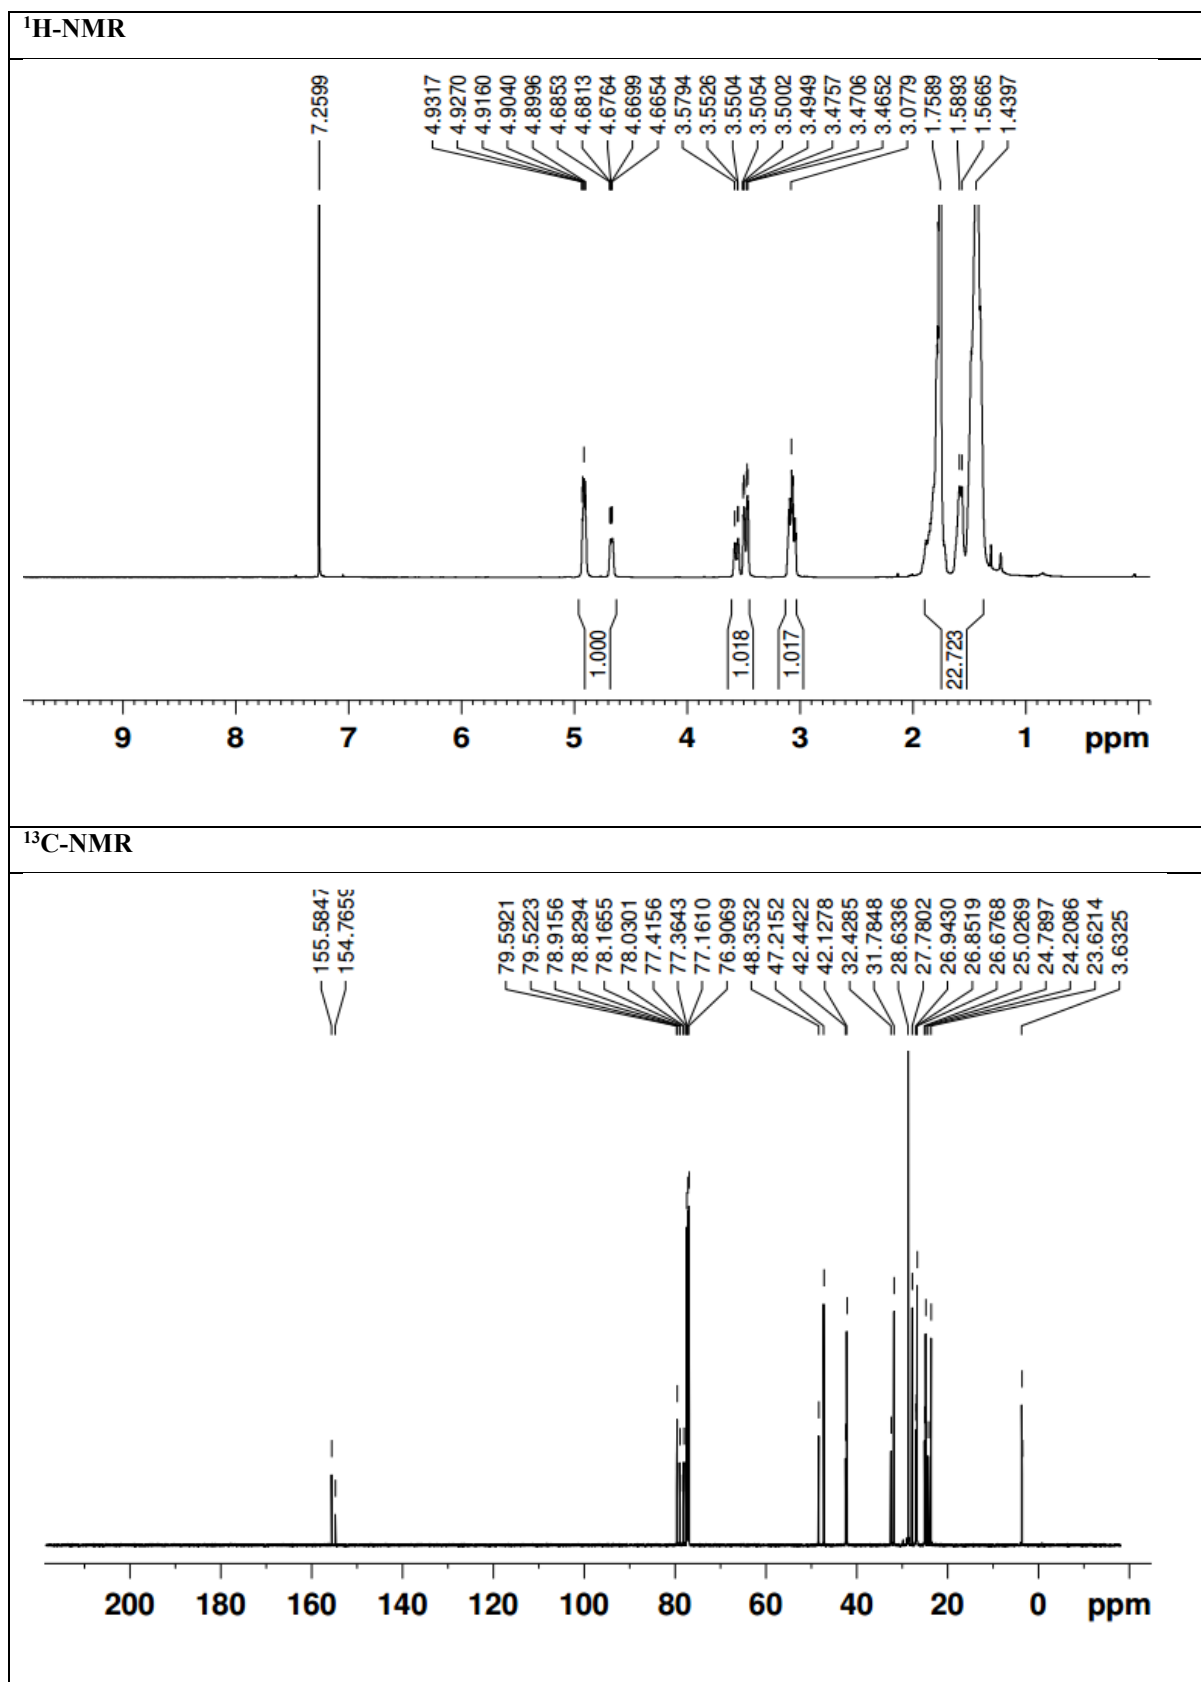





*tert*-Butyl 2-(prop-1-yn-1-yl)azonane-1-carboxylate (**51**)

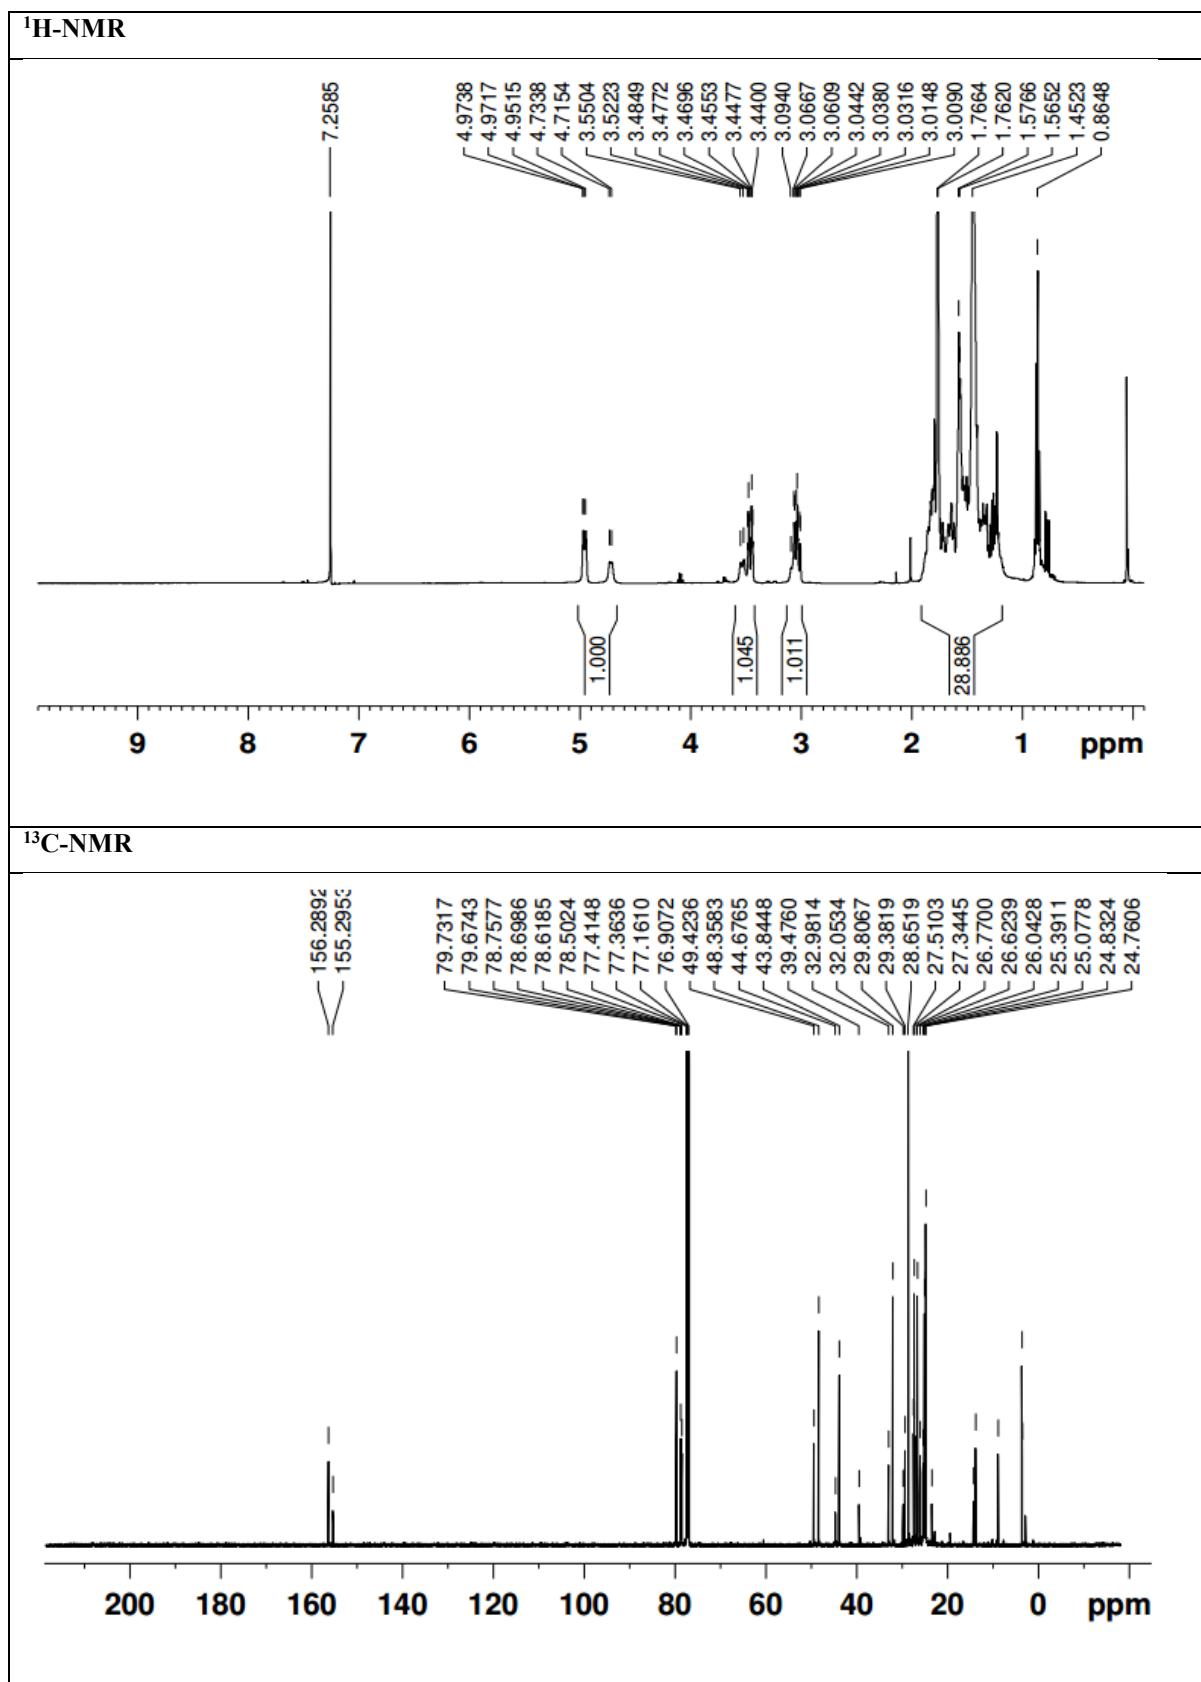

*tert*-Butyl 2-(phenylethynyl)piperidine-1-carboxylate (**5m**)

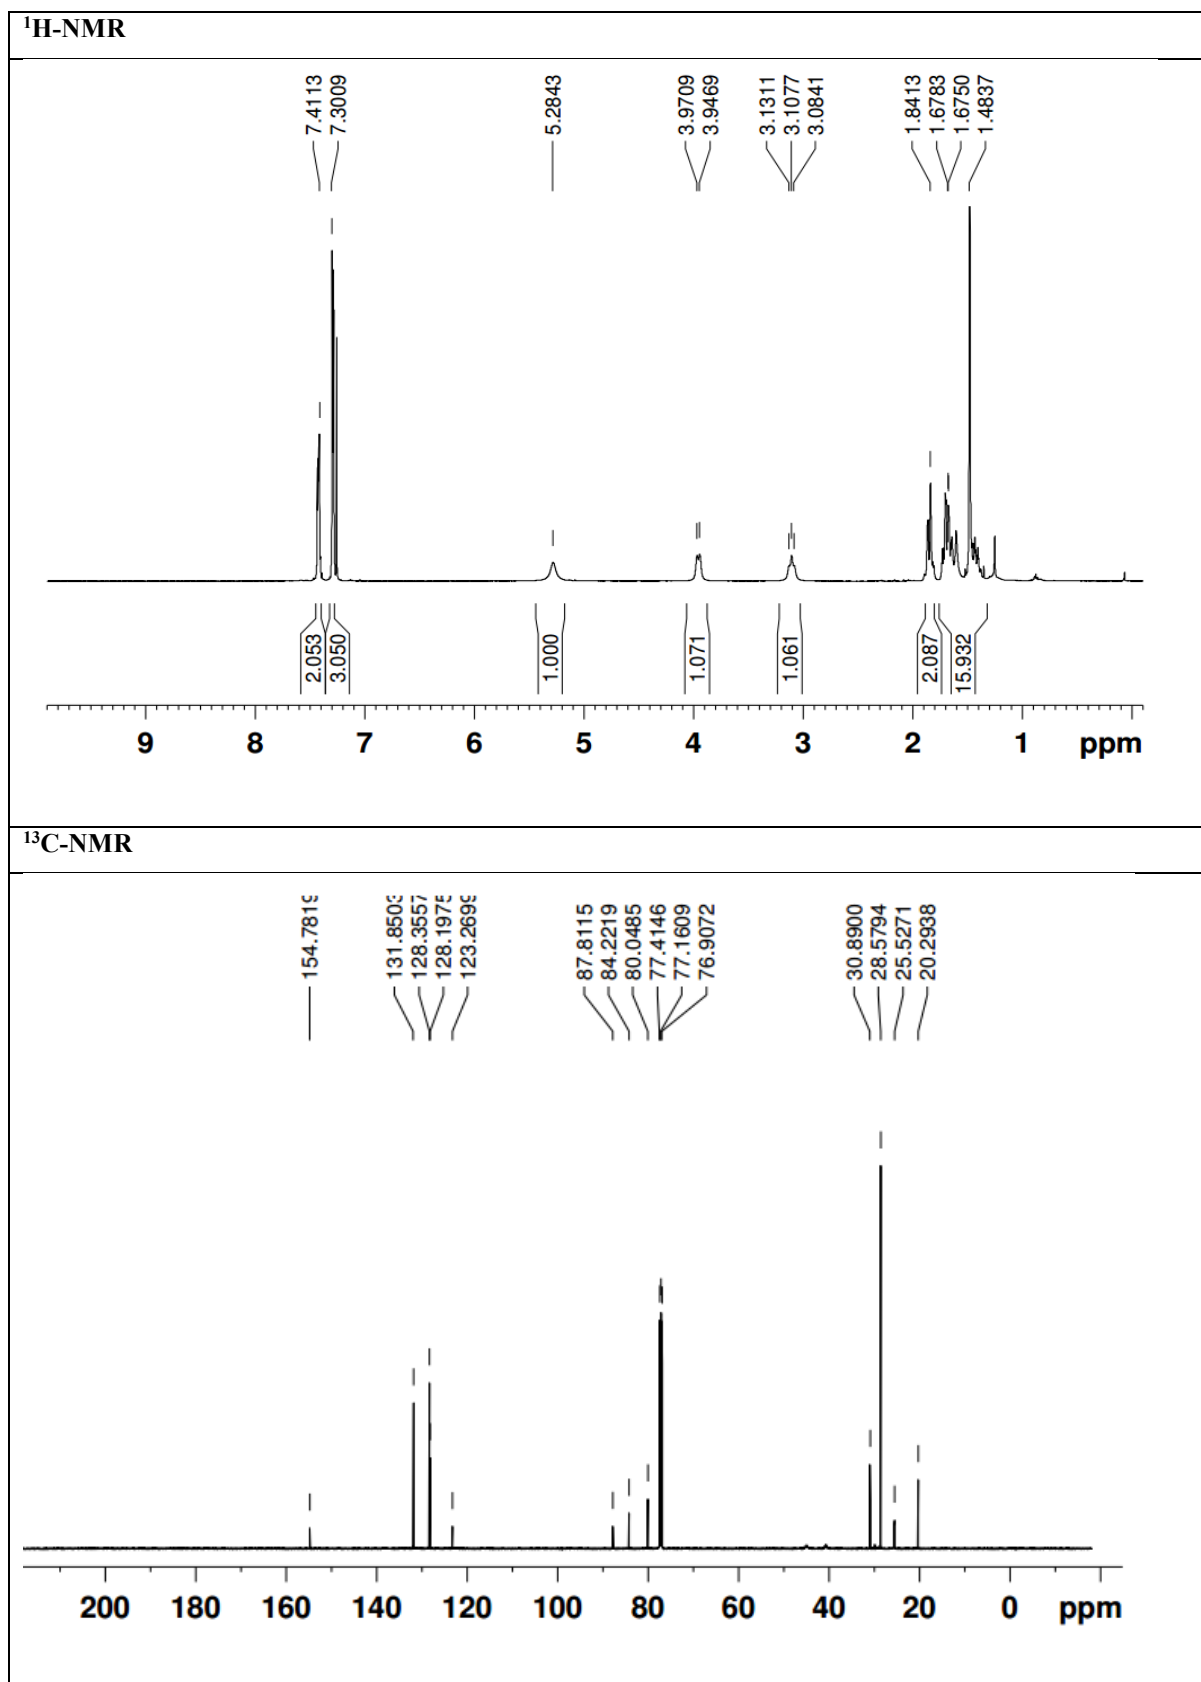

*tert*-Butyl 2-(phenylethynyl)azepane-1-carboxylate (**5n**)

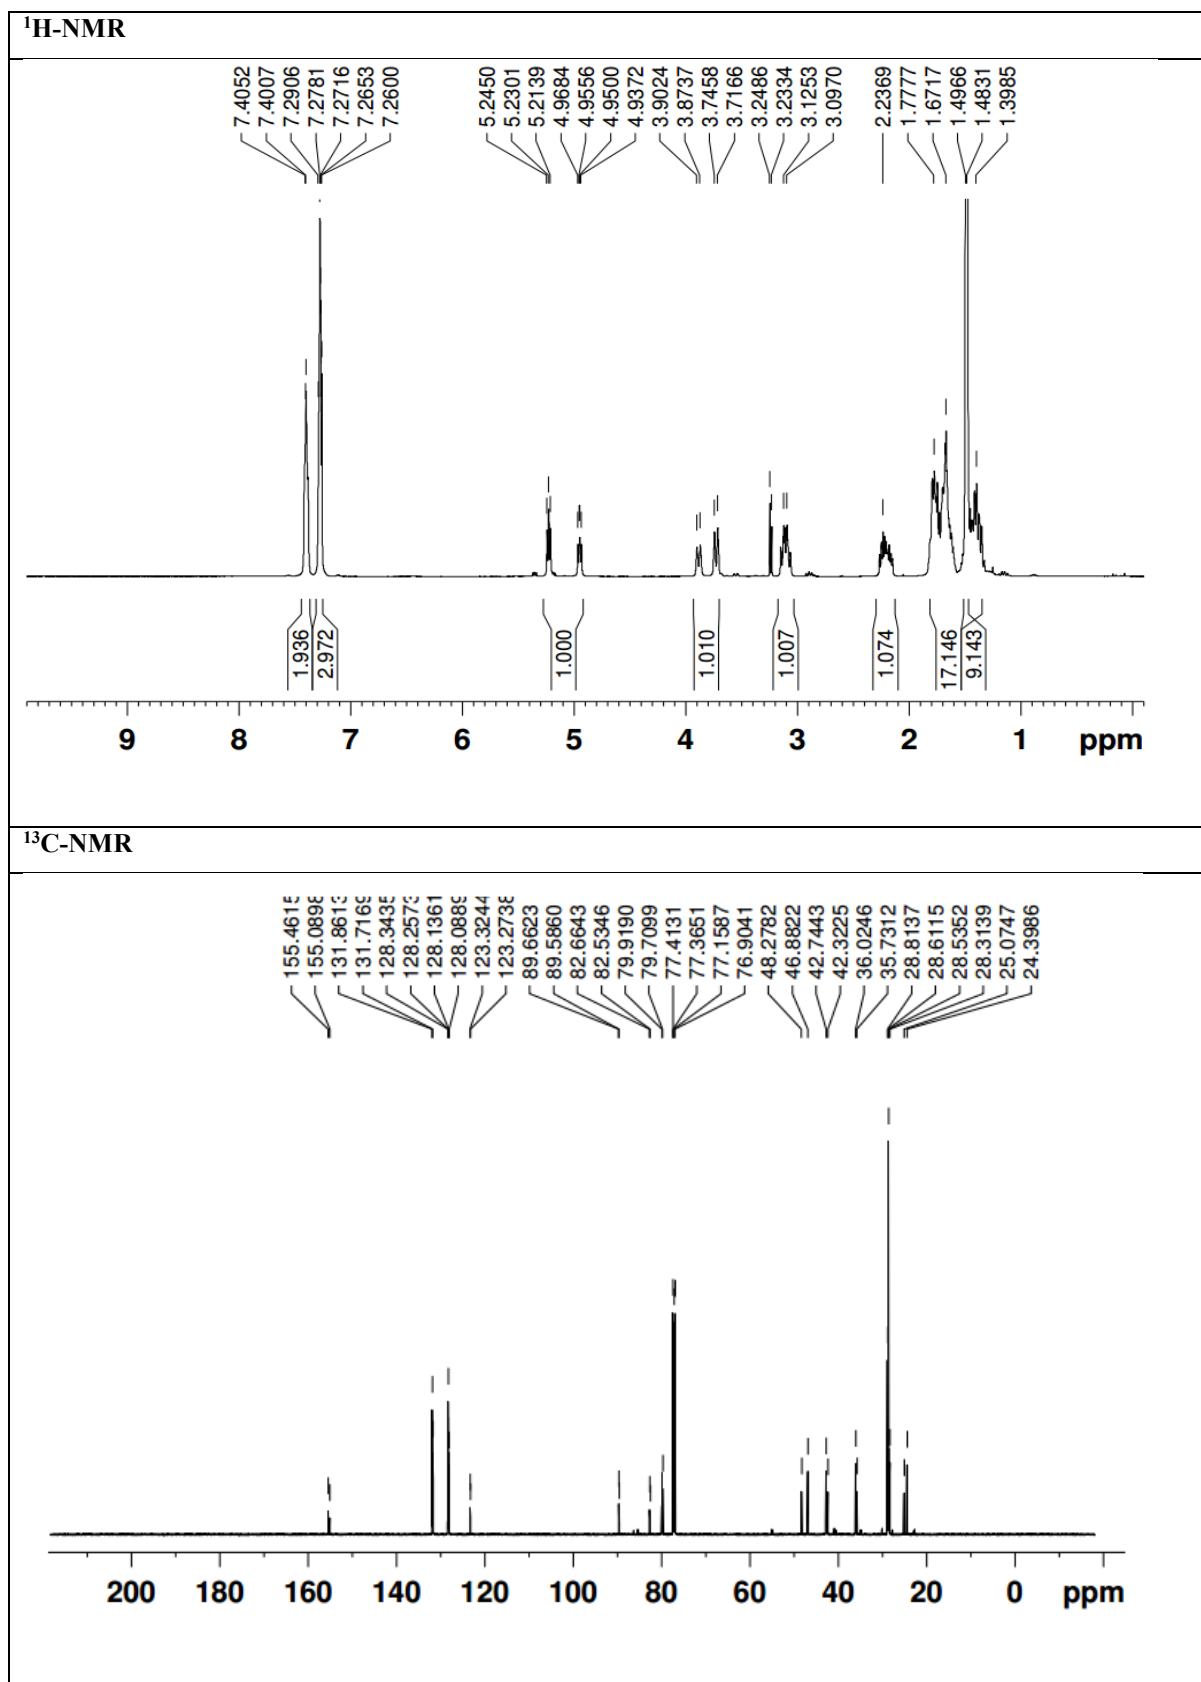

*tert*-Butyl 2-(phenylethynyl)azocane-1-carboxylate (**5o**)

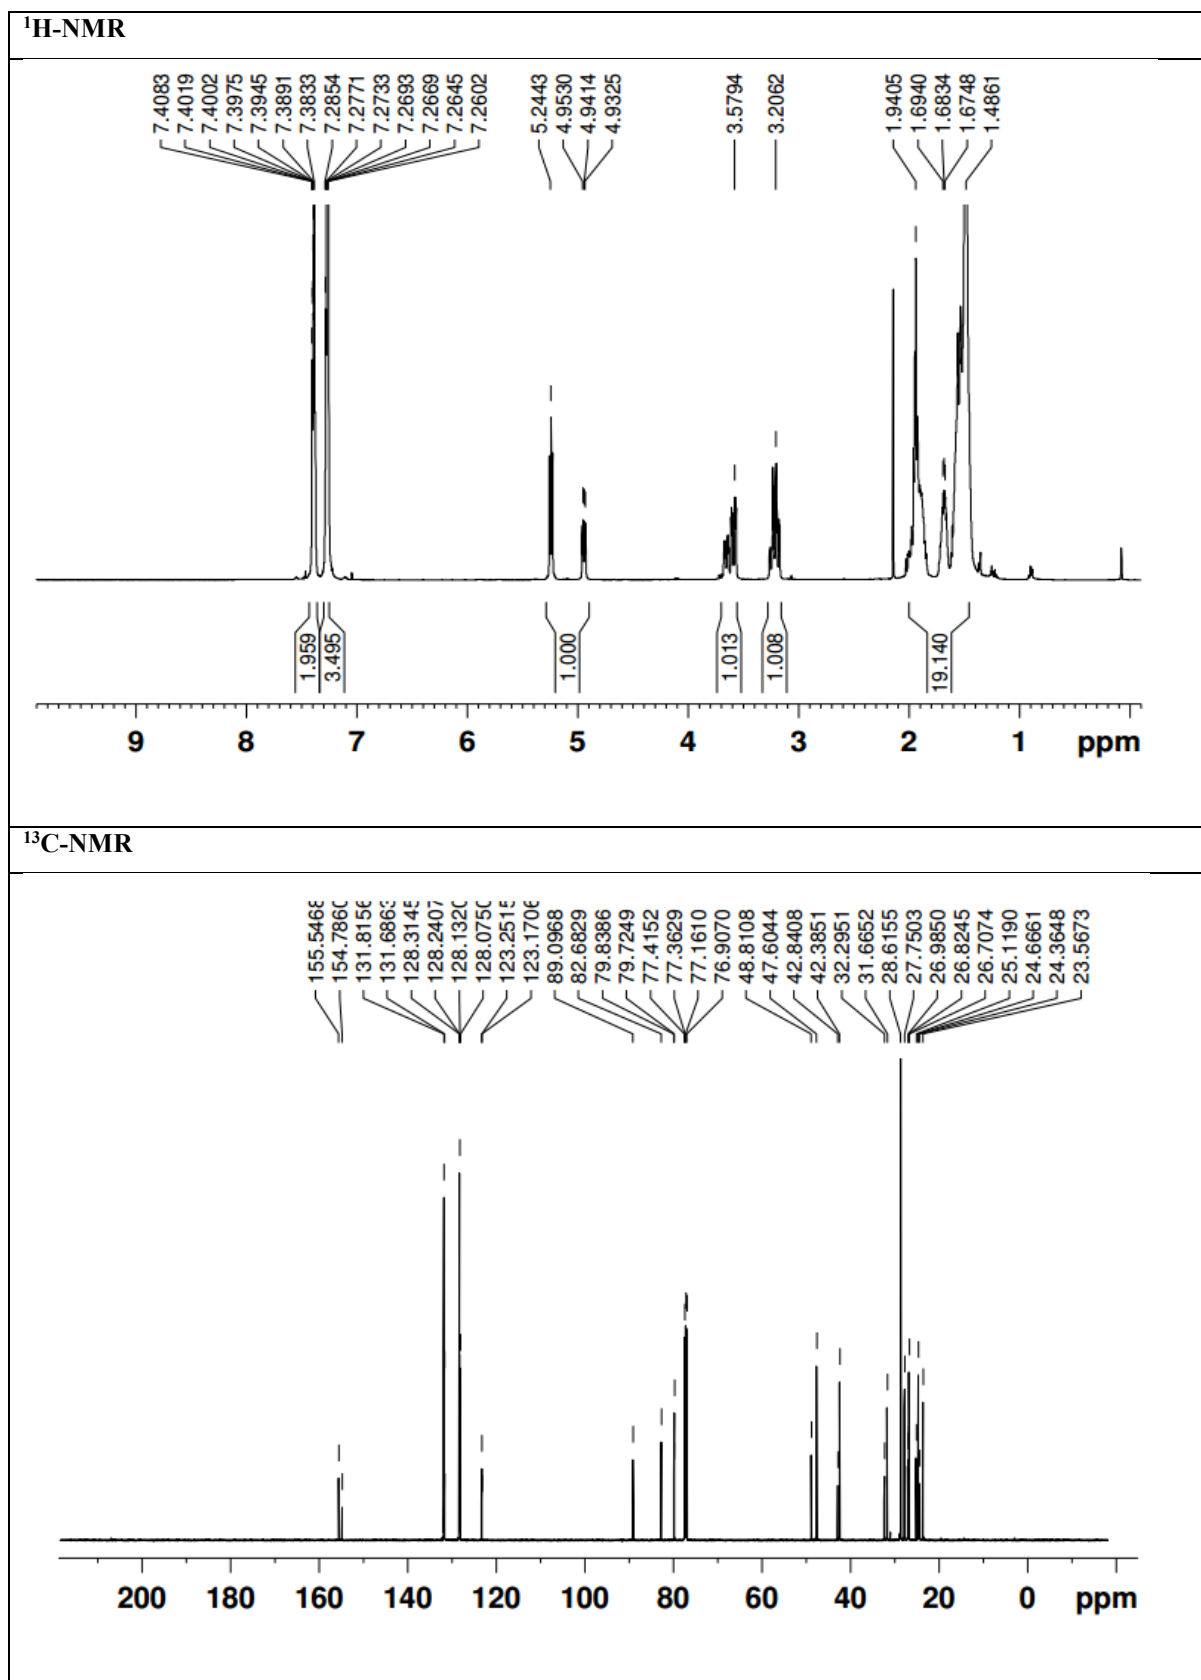

*tert*-Butyl 2-(phenylethynyl)azonane-1-carboxylate (**5p**)

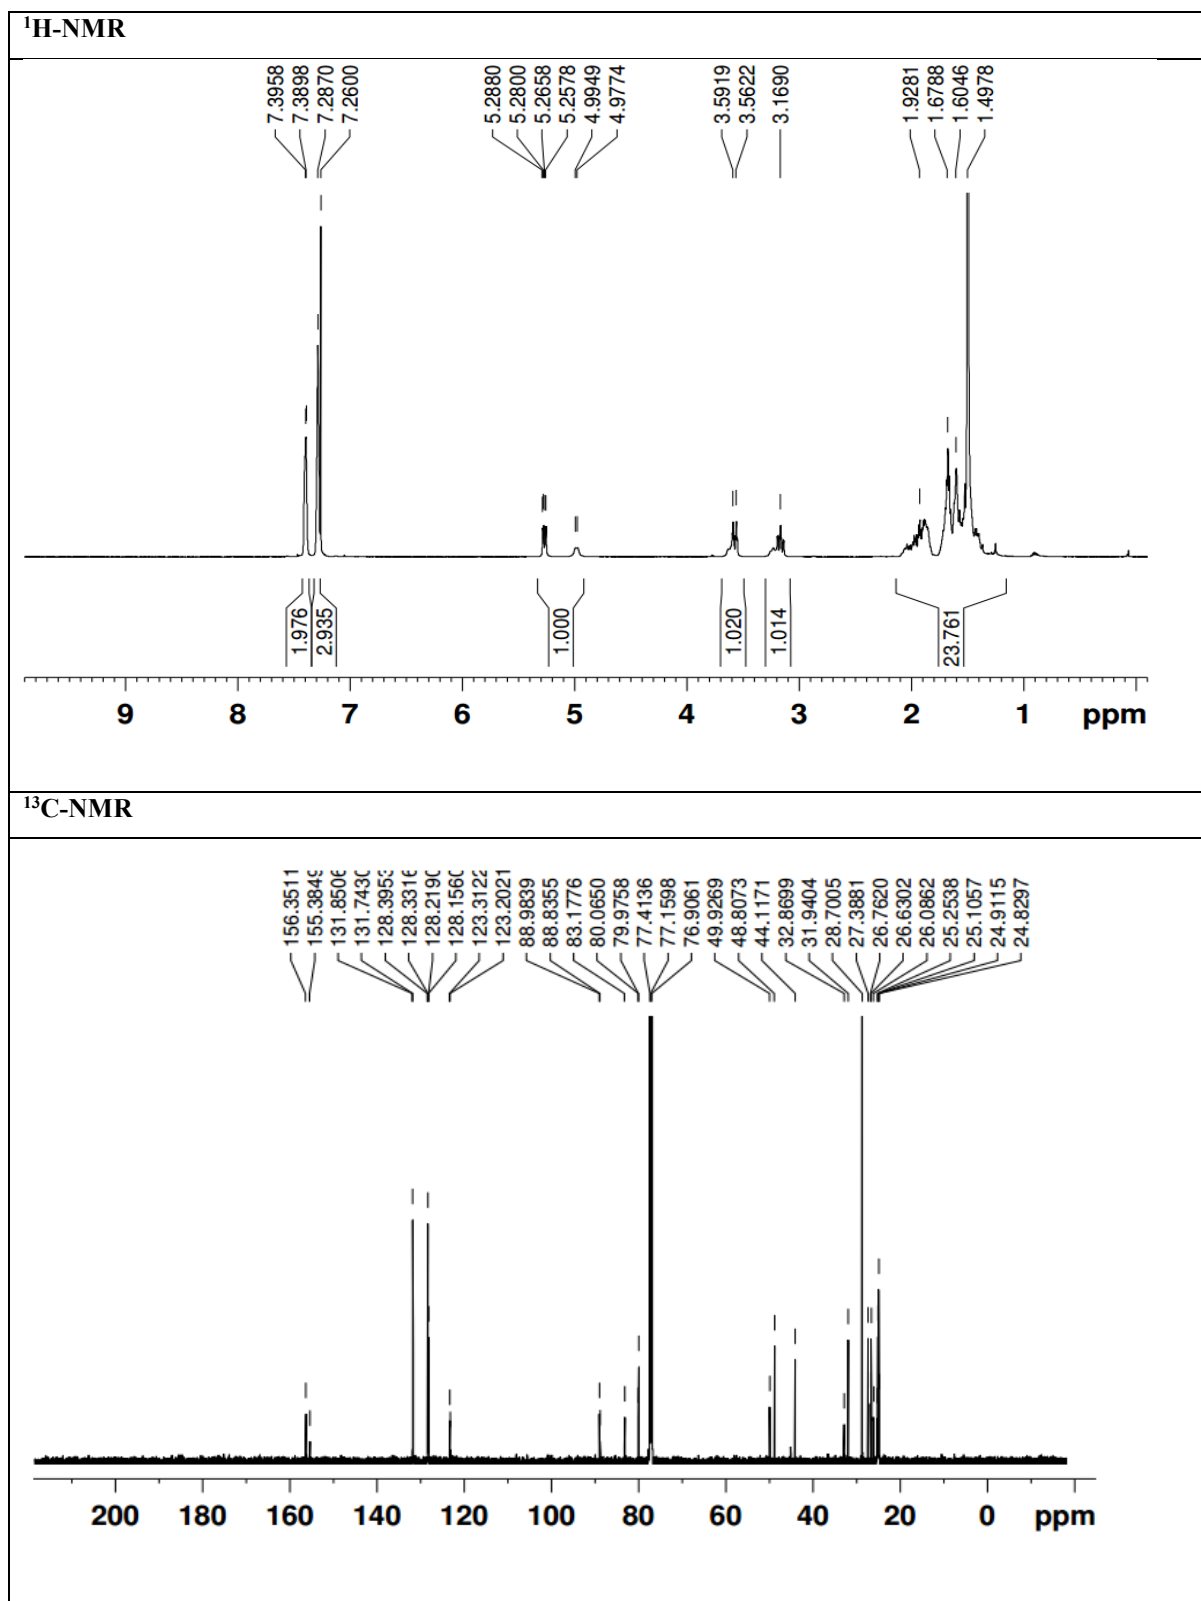

Supplement: molecules-23-03023-s001.pdf [file molecules-23-03023-s001.pdf]
